# Supplementary material for: The rise of MAX phase alloys – large-scale theoretical screening for the prediction of chemical order and disorder
Source: Royal Society of Chemistry journal article supplement (doi:10.1039/d2nr02414d), 2022-01-01
Supplement: d2nr02414d1.pdf [file d2nr02414d1.pdf]

Supplementary Information for

**The rise of MAX phase alloys - large-scale theoretical screening  
for prediction of chemical order and disorder**

Martin Dahlqvist\*, Johanna Rosen\*

*Materials Design, Department of Physics, Chemistry and Biology (IFM),  
Linköping University, SE-581 83 Linköping, Sweden*

\* corresponding authors: martin.dahlqvist@liu.se; johanna.rosen@liu.se

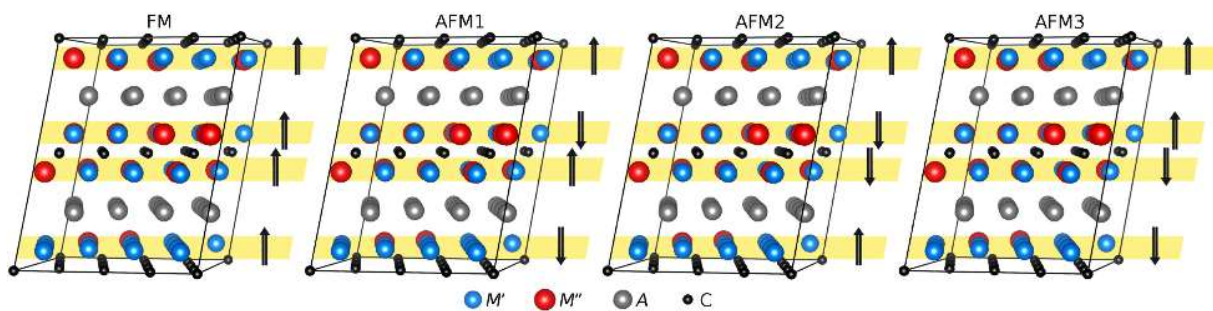

**Supplementary Fig. 1.** Schematic illustration of considered spin configurations for disordered solid solution MAX phases in a 120 atom supercell.

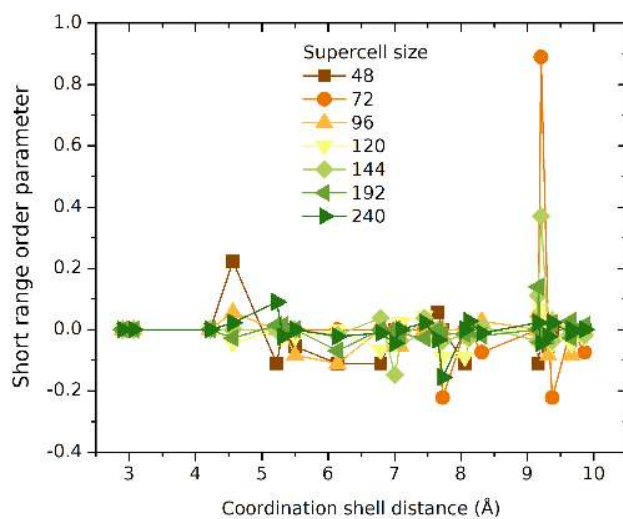

**Supplementary Fig. 2.** Short rang order parameter of the *M* sublattice as function of coordination shell distance for different supercell sizes considered when generating SQS supercells.

**Supplementary Table 1.** Experimentally reported quaternary 211 *M*-site solid solution MAX phases.

| <i>Year</i> | <i>Phase</i>                                          | <i>Reported x values</i> | <i>References</i> |
|-------------|-------------------------------------------------------|--------------------------|-------------------|
| 1980        | (Ti <sub>x</sub> V <sub>1-x</sub> ) <sub>2</sub> AlC  | ≤ 0.8                    | 1, 2, 3, 4        |
| 1980        | (V <sub>x</sub> Cr <sub>1-x</sub> ) <sub>2</sub> AlC  | 0 < x < 1                | 1, 2, 5, 6, 7     |
| 1980        | (Ti <sub>x</sub> Cr <sub>1-x</sub> ) <sub>2</sub> AlC | 0.02, 0.25, ≥ 0.75       | 1, 8              |
| 1980        | (Ti <sub>x</sub> Nb <sub>1-x</sub> ) <sub>2</sub> AlC | 0 < x < 1                | 1, 4, 9, 10, 11   |
| 1982        | (V <sub>x</sub> Ta <sub>1-x</sub> ) <sub>2</sub> AlC  | 0.65                     | 12                |
| 2019        | (Hf <sub>x</sub> Ta <sub>1-x</sub> ) <sub>2</sub> AlC | x < 0.25                 | 13                |
| 1983        | (Ti <sub>x</sub> Ta <sub>1-x</sub> ) <sub>2</sub> AlC | 0.4                      | 12, 14            |
| 2017        | (Ti <sub>x</sub> Zr <sub>1-x</sub> ) <sub>2</sub> AlC | ≤ 0.2, ≥ 0.55            | 15, 16            |
| 1980        | (V <sub>x</sub> Nb <sub>1-x</sub> ) <sub>2</sub> AlC  | 0 < x < 1                | 4, 12, 17, 18     |
| 2013        | (Cr <sub>x</sub> Mn <sub>1-x</sub> ) <sub>2</sub> AlC | ≥ 0.8                    | 19, 20, 21        |
| 2014        | (Zr <sub>x</sub> Nb <sub>1-x</sub> ) <sub>2</sub> AlC | 0 < x < 1                | 17, 22, 23        |
| 2018        | (Sc <sub>x</sub> Nb <sub>1-x</sub> ) <sub>2</sub> AlC | 0.33                     | 24                |
| 2018        | (Ti <sub>x</sub> Mo <sub>1-x</sub> ) <sub>2</sub> AlC | ≥ 0.8                    | 25                |
| 2017        | (V <sub>x</sub> Mn <sub>1-x</sub> ) <sub>2</sub> AlC  | 0.96                     | 26                |
| 2017        | (Cr <sub>x</sub> Fe <sub>1-x</sub> ) <sub>2</sub> AlC | ≥ 0.98                   | 21                |
| 2018        | (Cr <sub>x</sub> Mn <sub>1-x</sub> ) <sub>2</sub> GaC | 0.5, ≥ 0.7               | 20, 27, 28, 29    |
| 2015        | (Mo <sub>x</sub> Mn <sub>1-x</sub> ) <sub>2</sub> GaC | 0.5                      | 30                |
| 2009        | (Ti <sub>x</sub> Zr <sub>1-x</sub> ) <sub>2</sub> InC | 0.5                      | 31, 32            |
| 2002        | (Ti <sub>x</sub> Hf <sub>1-x</sub> ) <sub>2</sub> InC | 0.47, 0.5                | 31, 33            |
| 2011        | (Ti <sub>x</sub> V <sub>1-x</sub> ) <sub>2</sub> GeC  | 0.5                      | 34                |
| 2016        | (Ti <sub>x</sub> Cr <sub>1-x</sub> ) <sub>2</sub> GeC | ≥ 0.75                   | 35                |
| 2009        | (V <sub>x</sub> Cr <sub>1-x</sub> ) <sub>2</sub> GeC  | 0 < x < 1                | 35, 36, 37        |
| 2013        | (Cr <sub>x</sub> Mn <sub>1-x</sub> ) <sub>2</sub> GeC | ≥ 0.75                   | 35, 38, 39, 40    |
| 2016        | (Cr <sub>x</sub> Mo <sub>1-x</sub> ) <sub>2</sub> GeC | ≥ 0.5                    | 35                |
| 2018        | (Cr <sub>x</sub> Mn <sub>1-x</sub> ) <sub>2</sub> AuC | 0.5                      | 29                |

**Supplementary Table 2.** Experimentally reported quaternary *i*-MAX phases with *M*-site in-plane chemical order.

| Year | Phase                                                                                                     | References |
|------|-----------------------------------------------------------------------------------------------------------|------------|
| 2017 | (Mo <sub>2/3</sub> Sc <sub>1/3</sub> ) <sub>2</sub> AlC                                                   | 41         |
| 2017 | (Mo <sub>2/3</sub> Y <sub>1/3</sub> ) <sub>2</sub> AlC                                                    | 42         |
| 2017 | (Cr <sub>2/3</sub> Sc <sub>1/3</sub> ) <sub>2</sub> AlC                                                   | 43         |
| 2017 | (Cr <sub>2/3</sub> Y <sub>1/3</sub> ) <sub>2</sub> AlC                                                    | 43         |
| 2018 | (W <sub>2/3</sub> Sc <sub>1/3</sub> ) <sub>2</sub> AlC                                                    | 44         |
| 2018 | (W <sub>2/3</sub> Y <sub>1/3</sub> ) <sub>2</sub> AlC                                                     | 44         |
| 2018 | (Cr <sub>2/3</sub> Zr <sub>1/3</sub> ) <sub>2</sub> AlC                                                   | 45         |
| 2017 | (V <sub>2/3</sub> Zr <sub>1/3</sub> ) <sub>2</sub> AlC                                                    | 42         |
| 2019 | (V <sub>2/3</sub> Sc <sub>1/3</sub> ) <sub>2</sub> AlC                                                    | 46         |
| 2019 | (Mo <sub>2/3</sub> RE <sub>1/3</sub> ) <sub>2</sub> AlC (RE = Ce, Pr, Nd, Sm, Pd, Tb, Dy, Ho, Er, Tm, Lu) | 47         |
| 2018 | (Mo <sub>2/3</sub> Sc <sub>1/3</sub> ) <sub>2</sub> GaC                                                   | 48         |
| 2018 | (Mo <sub>2/3</sub> Y <sub>1/3</sub> ) <sub>2</sub> GaC                                                    | 48         |
| 2019 | (Cr <sub>2/3</sub> Sc <sub>1/3</sub> ) <sub>2</sub> GaC                                                   | 49         |
| 2019 | (Mn <sub>2/3</sub> Sc <sub>1/3</sub> ) <sub>2</sub> GaC                                                   | 49         |
| 2019 | (Mo <sub>2/3</sub> RE <sub>1/3</sub> ) <sub>2</sub> GaC (RE = Gd, Tb, Dy, Ho, Er, Tm, Yb, Lu)             | 50         |

**Supplementary Table 3.** Atomic radius and electronegativity (Pauling scale) considered for *M* and *A*.<sup>51, 52</sup>

| <i>M</i> | Atomic radius $r_M$ (Å) | Electronegativity (Pauling scale) | <i>A</i> | Atomic radius $r_A$ (Å) | Electronegativity (Pauling scale) |
|----------|-------------------------|-----------------------------------|----------|-------------------------|-----------------------------------|
| Sc       | 1.62                    | 1.36                              | Al       | 1.43                    | 1.61                              |
| Y        | 1.80                    | 1.22                              | Ga       | 1.40                    | 1.81                              |
| Ti       | 1.47                    | 1.54                              | In       | 1.58                    | 1.78                              |
| Zr       | 1.60                    | 1.33                              | Si       | 1.38                    | 1.90                              |
| Hf       | 1.59                    | 1.30                              | Ge       | 1.44                    | 2.01                              |
| V        | 1.35                    | 1.63                              | Sn       | 1.63                    | 1.96                              |
| Nb       | 1.46                    | 1.60                              | Ni       | 1.25                    | 1.91                              |
| Ta       | 1.46                    | 1.50                              | Pd       | 1.37                    | 2.20                              |
| Cr       | 1.29                    | 1.66                              | Pt       | 1.38                    | 2.28                              |
| Mo       | 1.39                    | 2.16                              | Cu       | 1.28                    | 1.90                              |
| W        | 1.39                    | 2.36                              | Ag       | 1.44                    | 1.93                              |
| Mn       | 1.27                    | 1.55                              | Au       | 1.44                    | 2.54                              |
| Fe       | 1.26                    | 1.83                              | Zn       | 1.36                    | 1.65                              |
| Co       | 1.25                    | 1.88                              |          |                         |                                   |
| Ni       | 1.25                    | 1.91                              |          |                         |                                   |

**Supplementary Table 4.** 92 *i*-MAX phases predicted stable. Synthesized phases in bold.

| A  | M' | M'' | $\Delta H_i^{\text{MAX}}$<br>(meV/atom) | Equilibrium simplex                                                                                                                                               | Status                    |
|----|----|-----|-----------------------------------------|-------------------------------------------------------------------------------------------------------------------------------------------------------------------|---------------------------|
| Al | Mo | Y   | <b>-100.7</b>                           | YMoC <sub>2</sub> , Mo <sub>3</sub> Al, YAl <sub>2</sub> , YAl <sub>3</sub> C <sub>3</sub>                                                                        | synthesized <i>i</i> -MAX |
| Al | Cr | Sc  | <b>-90.3</b>                            | Cr <sub>2</sub> AlC, Sc <sub>3</sub> AlC, Sc <sub>2</sub> Al <sub>2</sub> C <sub>3</sub> , ScAl <sub>3</sub>                                                      | synthesized <i>i</i> -MAX |
| Al | Cr | Zr  | <b>-58.5</b>                            | ZrC, Cr <sub>2</sub> AlC, Cr <sub>2</sub> Al, ZrAl <sub>3</sub>                                                                                                   | synthesized <i>i</i> -MAX |
| Al | V  | Zr  | <b>-50.3</b>                            | V <sub>2</sub> AlC, Zr <sub>4</sub> AlC <sub>3</sub> , Zr <sub>2</sub> Al <sub>3</sub> , V <sub>2</sub> C                                                         | synthesized <i>i</i> -MAX |
| Al | Mo | Sc  | <b>-38.6</b>                            | Mo <sub>2</sub> ScAlC <sub>2</sub> ( <i>o</i> -MAX), (Sc <sub>2/3</sub> Mo <sub>1/3</sub> ) <sub>2</sub> AlC, Mo <sub>3</sub> Al, Mo <sub>3</sub> Al <sub>8</sub> | synthesized <i>i</i> -MAX |
| Al | Cr | Y   | <b>-32.2</b>                            | Cr <sub>2</sub> AlC, YAl <sub>2</sub> , Y <sub>2</sub> Cr <sub>2</sub> C <sub>3</sub> , Cr <sub>7</sub> C <sub>3</sub>                                            | synthesized <i>i</i> -MAX |
| Al | W  | Sc  | <b>-26.6</b>                            | ScW <sub>2</sub> AlC <sub>2</sub> (A), W, ScAl <sub>3</sub>                                                                                                       | synthesized <i>i</i> -MAX |
| Al | V  | Sc  | <b>-26.2</b>                            | ScAl <sub>2</sub> , Sc <sub>3</sub> AlC, V <sub>2</sub> AlC, V <sub>12</sub> Al <sub>3</sub> C <sub>8</sub>                                                       | synthesized <i>i</i> -MAX |
| Al | W  | Y   | <b>-22.3</b>                            | WC, W, YAl <sub>2</sub> , YWC <sub>2</sub>                                                                                                                        | synthesized <i>i</i> -MAX |
| Al | Mn | Sc  | -95.4                                   | Mn <sub>3</sub> AlC, Sc <sub>2</sub> Al <sub>2</sub> C <sub>3</sub> , MnAl, Sc <sub>3</sub> AlC                                                                   |                           |
| Al | V  | Hf  | -29.1                                   | V <sub>2</sub> AlC, Hf <sub>3</sub> AlC <sub>2</sub> , HfAl <sub>2</sub> , V <sub>3</sub> Al                                                                      |                           |
| Al | Ti | Zr  | -28.0                                   | Ti <sub>2</sub> AlC, Zr <sub>3</sub> AlC <sub>2</sub> , Zr <sub>4</sub> Al <sub>3</sub> , Zr <sub>2</sub> Al <sub>3</sub>                                         |                           |
| Al | Cr | Hf  | -24.7                                   | HfC, Cr <sub>2</sub> AlC, Cr <sub>2</sub> Al, Cr <sub>5</sub> Al <sub>21</sub>                                                                                    |                           |
| Al | Nb | Y   | -24.7                                   | YAl <sub>2</sub> , Nb <sub>12</sub> Al <sub>3</sub> C <sub>8</sub> , Y <sub>3</sub> AlC, Nb <sub>2</sub> C                                                        |                           |
| Al | Sc | W   | -24.6                                   | (W <sub>2/3</sub> Sc <sub>1/3</sub> ) <sub>2</sub> AlC, Sc <sub>3</sub> AlC, Sc <sub>2</sub> Al <sub>2</sub> C <sub>3</sub> , ScAl <sub>3</sub>                   |                           |
| Al | Mn | Y   | -24.0                                   | Mn <sub>3</sub> AlC, YMn <sub>4</sub> Al <sub>8</sub> , YAl <sub>2</sub> , Y <sub>10</sub> Mn <sub>13</sub> C <sub>18</sub>                                       |                           |
| Al | Mn | Zr  | -22.8                                   | MnAl, ZrC, Mn <sub>3</sub> AlC, C                                                                                                                                 |                           |
| Al | Cr | Nb  | -20.4                                   | Cr <sub>2</sub> AlC, Cr <sub>2</sub> Al, NbAl <sub>3</sub> , Nb <sub>12</sub> Al <sub>3</sub> C <sub>8</sub>                                                      |                           |
| Al | Cr | Ta  | -14.5                                   | Cr <sub>2</sub> AlC, Cr <sub>2</sub> Al, Ta <sub>2</sub> Al, Ta <sub>12</sub> Al <sub>3</sub> C <sub>8</sub>                                                      |                           |
| Al | W  | Zr  | -10.5                                   | WC, C, ZrC, ZrAl <sub>3</sub>                                                                                                                                     |                           |
| Al | Mo | Zr  | -9.3                                    | ZrC, Mo <sub>3</sub> Al, C, Mo <sub>3</sub> Al <sub>8</sub>                                                                                                       |                           |
| Al | Ti | Y   | -2.6                                    | Ti <sub>3</sub> AlC <sub>2</sub> , YAl <sub>2</sub> , Y <sub>3</sub> AlC, Y <sub>2</sub> Al                                                                       |                           |
| Al | V  | Y   | -0.7                                    | YAl <sub>2</sub> , Y <sub>3</sub> Al, V <sub>12</sub> Al <sub>3</sub> C <sub>8</sub> , V <sub>2</sub> C                                                           |                           |
| Au | Ti | Zr  | -10.8                                   | TiC <sub>0.75</sub> , ZrAu <sub>2</sub> , ZrC <sub>0.875</sub> , Ti <sub>3</sub> Au                                                                               |                           |
| Cu | Mn | Sc  | -43.0                                   | Cu, ScCu <sub>2</sub> , Sc <sub>3</sub> C <sub>4</sub> , Mn <sub>23</sub> C                                                                                       |                           |
| Cu | Cr | Sc  | -3.5                                    | Cu, ScCu <sub>2</sub> , Cr <sub>7</sub> C <sub>3</sub> , Sc <sub>2</sub> CrC <sub>3</sub>                                                                         |                           |
| Cu | Mo | Sc  | -1.1                                    | Mo <sub>2</sub> C, ScCu <sub>2</sub> , Cu, Sc <sub>3</sub> C <sub>4</sub>                                                                                         |                           |
| Ga | Mn | Sc  | <b>-98.8</b>                            | Mn <sub>7</sub> GaC, (Sc <sub>2/3</sub> Mn <sub>1/3</sub> ) <sub>2</sub> GaC                                                                                      | synthesized <i>i</i> -MAX |
| Ga | Cr | Sc  | <b>-80.5</b>                            | Cr <sub>3</sub> C <sub>2</sub> , ScGa <sub>2</sub> , (Sc <sub>2/3</sub> Cr <sub>1/3</sub> ) <sub>2</sub> GaC                                                      | synthesized <i>i</i> -MAX |
| Ga | Mo | Sc  | <b>-49.2</b>                            | Mo <sub>2</sub> ScGaC <sub>2</sub> , ScGa <sub>3</sub> , Mo <sub>3</sub> Ga, (Sc <sub>2/3</sub> Mo <sub>1/3</sub> ) <sub>2</sub> GaC                              | synthesized <i>i</i> -MAX |
| Ga | Mo | Y   | <b>-47.2</b>                            | Mo <sub>2</sub> C, YGa <sub>2</sub> , (Y <sub>2/3</sub> Mo <sub>1/3</sub> ) <sub>2</sub> GaC, C                                                                   | synthesized <i>i</i> -MAX |
| Ga | Sc | Mo  | -72.2                                   | (Mo <sub>2/3</sub> Sc <sub>1/3</sub> ) <sub>2</sub> GaC, Sc <sub>2</sub> MoGaC <sub>2</sub> , Sc <sub>3</sub> GaC, ScGa <sub>2</sub>                              |                           |
| Ga | Cr | Zr  | -62.4                                   | ZrC, ZrGa <sub>3</sub> , Cr <sub>2</sub> GaC, Cr <sub>7</sub> C <sub>3</sub>                                                                                      |                           |
| Ga | Sc | W   | -53.8                                   | Sc <sub>2</sub> WGaC <sub>2</sub> , ScGa <sub>2</sub> , W, Sc <sub>11</sub> Ga <sub>10</sub>                                                                      |                           |
| Ga | V  | Sc  | -43.9                                   | ScGa <sub>2</sub> , V <sub>6</sub> C <sub>5</sub> , V <sub>2</sub> GaC, Sc <sub>11</sub> Ga <sub>10</sub>                                                         |                           |
| Ga | Mo | Zr  | -35.6                                   | ZrC, Mo <sub>2</sub> Ga <sub>2</sub> C, Mo <sub>3</sub> Ga, MoGa <sub>4</sub>                                                                                     |                           |
| Ga | V  | Zr  | -31.3                                   | V <sub>2</sub> GaC, ZrGa, Zr <sub>3</sub> GaC <sub>2</sub>                                                                                                        |                           |
| Ga | Mn | Zr  | -30.7                                   | ZrC, Mn <sub>2</sub> GaC, Mn <sub>3</sub> Ga, MnGa <sub>4</sub>                                                                                                   |                           |
| Ga | Y  | Mo  | -24.7                                   | (Mo <sub>2/3</sub> Y <sub>1/3</sub> ) <sub>2</sub> GaC, Y <sub>3</sub> GaC, YGa <sub>2</sub> , Y <sub>4</sub> C <sub>5</sub>                                      |                           |
| Ga | Y  | W   | -23.5                                   | YWC <sub>2</sub> , YGa <sub>2</sub> , W, Y <sub>3</sub> GaC                                                                                                       |                           |
| Ga | Cr | Hf  | -18.6                                   | HfC, CrGa <sub>4</sub> , Cr <sub>23</sub> C <sub>6</sub>                                                                                                          |                           |
| Ga | V  | Hf  | -17.1                                   | V <sub>2</sub> GaC, Hf <sub>2</sub> GaC                                                                                                                           |                           |
| Ga | Sc | V   | -13.2                                   | (V <sub>2/3</sub> Sc <sub>1/3</sub> ) <sub>2</sub> GaC, Sc <sub>3</sub> GaC, ScGa <sub>2</sub> , Sc <sub>3</sub> C <sub>4</sub>                                   |                           |
| Ga | Zr | Mo  | -10.4                                   | ZrC, Mo <sub>3</sub> Ga, ZrGa <sub>3</sub> , Zr <sub>4</sub> GaC <sub>3</sub>                                                                                     |                           |
| Ga | Cr | Nb  | -6.5                                    | Cr <sub>2</sub> GaC, Nb <sub>2</sub> GaC                                                                                                                          |                           |
| Ga | Mn | Y   | -4.9                                    | YGa <sub>2</sub> , C, Mn <sub>23</sub> C <sub>6</sub> , Y <sub>10</sub> Mn <sub>13</sub> C <sub>18</sub>                                                          |                           |
| Ga | Sc | Cr  | -4.7                                    | (Cr <sub>2/3</sub> Sc <sub>1/3</sub> ) <sub>2</sub> GaC, ScGa <sub>2</sub> , Sc <sub>3</sub> GaC, Sc <sub>2</sub> CrC <sub>3</sub>                                |                           |
| Ga | Ti | Sc  | -3.3                                    | Ti <sub>3</sub> GaC <sub>2</sub> , ScGa <sub>2</sub> , Sc <sub>3</sub> GaC, Sc <sub>11</sub> Ga <sub>10</sub>                                                     |                           |
| Ga | Zr | W   | -3.1                                    | ZrC, W, ZrGa <sub>3</sub>                                                                                                                                         |                           |
| Ga | Nb | Y   | -1.8                                    | YGa <sub>2</sub> , Nb <sub>2</sub> C, Nb <sub>6</sub> C <sub>5</sub> , Y <sub>5</sub> Ga <sub>3</sub>                                                             |                           |
| Ga | Cr | Ta  | -0.5                                    | Cr <sub>2</sub> GaC, Ta <sub>2</sub> C, CrGa <sub>4</sub> , Cr <sub>23</sub> C <sub>6</sub>                                                                       |                           |
| Ga | Fe | Sc  | -0.1                                    | C, Sc <sub>3</sub> FeC <sub>4</sub> , ScGa <sub>6</sub> Fe <sub>6</sub> , Fe <sub>3</sub> Ga                                                                      |                           |
| Ge | Sc | Mo  | <b>-45.3</b>                            | Sc <sub>2</sub> MoGeC <sub>2</sub> , ScGe, Sc <sub>2</sub> Mo <sub>3</sub> Ge <sub>4</sub> , C                                                                    |                           |
| Ge | Sc | W   | -25.6                                   | ScGe, Sc <sub>2</sub> WGeC <sub>2</sub> , WC                                                                                                                      |                           |
| Ge | Sc | V   | -11.8                                   | ScGe, C, Sc <sub>3</sub> GeC, V <sub>6</sub> C <sub>5</sub>                                                                                                       |                           |
| Ge | Cr | Sc  | -9.5                                    | ScCrGe <sub>2</sub> , Cr <sub>3</sub> C <sub>2</sub> , ScGe, C                                                                                                    |                           |
| Ge | Sc | Cr  | -5.2                                    | ScGe, ScCrC <sub>2</sub> , Cr <sub>3</sub> C <sub>2</sub> , C                                                                                                     |                           |
| In | Sc | W   | -9.7                                    | Sc <sub>2</sub> WInC <sub>2</sub> , W, ScIn <sub>3</sub> , Sc <sub>3</sub> InC                                                                                    |                           |
| Ni | Mn | Sc  | -12.1                                   | ScNi <sub>2</sub> , C, Sc <sub>3</sub> NiC <sub>4</sub> , Mn <sub>23</sub> C <sub>6</sub>                                                                         |                           |
| Pd | Sc | Y   | -29.6                                   | ScPd, Y <sub>4</sub> C <sub>5</sub> , Sc <sub>4</sub> C <sub>3</sub> , Y <sub>2</sub> C                                                                           |                           |
| Pd | Ti | Y   | -0.4                                    | TiC <sub>0.75</sub> , YPd <sub>3</sub> , Y                                                                                                                        |                           |
| Pt | Ti | Zr  | -22.2                                   | TiC <sub>0.875</sub> , TiPt, Zr <sub>9</sub> Pt <sub>11</sub> , Ti <sub>3</sub> Pt                                                                                |                           |
| Pt | V  | Zr  | -0.8                                    | V <sub>2</sub> C, V <sub>6</sub> C <sub>5</sub> , ZrPt <sub>3</sub> , Zr <sub>9</sub> Pt <sub>11</sub>                                                            |                           |
| Si | Sc | W   | -44.1                                   | Sc <sub>2</sub> WSiC <sub>2</sub> , SiC, Sc <sub>2</sub> W <sub>3</sub> Si <sub>4</sub> , Sc <sub>5</sub> Si <sub>3</sub>                                         |                           |
| Si | Cr | Sc  | -29.9                                   | C, ScCrC <sub>2</sub> , Sc <sub>2</sub> Cr <sub>4</sub> Si <sub>5</sub> , Cr <sub>3</sub> Si                                                                      |                           |
| Si | Mn | Sc  | -13.4                                   | MnSi, Sc <sub>3</sub> C <sub>4</sub> , Mn <sub>3</sub> Si, C                                                                                                      |                           |
| Si | Sc | Mo  | -4.0                                    | Sc <sub>3</sub> C <sub>4</sub> , Sc <sub>2</sub> Mo <sub>3</sub> Si <sub>4</sub> , C, Sc <sub>5</sub> Si <sub>3</sub>                                             |                           |
| Si | Sc | V   | -1.2                                    | Sc <sub>5</sub> Si <sub>3</sub> C <sub>0.5</sub> , SiC, V <sub>6</sub> C <sub>5</sub> , C                                                                         |                           |
| Si | V  | Sc  | -1.2                                    | SiC, V <sub>6</sub> C <sub>5</sub> , Sc <sub>2</sub> V <sub>3</sub> Si <sub>4</sub> , Sc <sub>5</sub> Si <sub>3</sub> C <sub>0.5</sub>                            |                           |
| Zn | Mn | Sc  | -99.8                                   | Sc <sub>3</sub> C <sub>4</sub> , Sc <sub>3</sub> Zn <sub>17</sub> , Mn <sub>23</sub> C <sub>6</sub> , ScZn <sub>3</sub>                                           |                           |
| Zn | Mo | Sc  | -58.6                                   | Mo <sub>2</sub> C, (Sc <sub>2/3</sub> Mo <sub>1/3</sub> ) <sub>2</sub> Zn <sub>2</sub> C, C, Sc <sub>3</sub> Zn <sub>17</sub>                                     |                           |
| Zn | Cr | Sc  | -57.4                                   | ScZn <sub>3</sub> , Cr <sub>7</sub> C <sub>3</sub> , Sc <sub>2</sub> CrC <sub>3</sub>                                                                             |                           |
| Zn | Fe | Sc  | -52.9                                   | Fe, C, Sc <sub>3</sub> FeC <sub>4</sub> , Sc <sub>3</sub> Zn <sub>17</sub>                                                                                        |                           |
| Zn | V  | Hf  | -52.7                                   | V <sub>2</sub> ZnC, HfC, Hf <sub>3</sub> Zn <sub>3</sub> C, V <sub>2</sub> C                                                                                      |                           |
| Zn | V  | Zr  | -45.5                                   | V <sub>2</sub> C, ZrC, ZrZn <sub>3</sub>                                                                                                                          |                           |

|    |    |    |       |                                                         |
|----|----|----|-------|---------------------------------------------------------|
| Zn | Sc | W  | -42.4 | $(W_{2/3}Sc_{1/3})_2ZnC$ , $ScZn_2$ , $Sc_4C_3$ , $W$   |
| Zn | Sc | Mo | -41.1 | $(Mo_{2/3}Y_{1/3})_2ZnC$ , $YZn$ , $Y_2C$ , $Y_4C_5$    |
| Zn | Mo | Y  | -38.7 | $Mo_2C$ , $YZn_3$ , $(Y_{2/3}Mo_{1/3})_2ZnC$ , $YMoC_2$ |
| Zn | Ti | Zr | -31.5 | $TiC_{0.75}$ , $Zr_3Zn_3C$ , $Ti_2C$ , $Ti_3Zn_3C$      |
| Zn | Cr | Zr | -31.5 | $ZrC$ , $ZrZn_{16}$ , $Cr_{23}C_6$ , $Cr_7C_3$          |
| Zn | V  | Sc | -30.1 | $ScZn_2$ , $ScZn$ , $V_2C$ , $V_6C_5$                   |
| Zn | Mn | Zr | -27.5 | $Zn$ , $ZrC$ , $Mn_{23}C_6$ , $MnZn_3$                  |
| Zn | Co | Sc | -26.7 | $Co$ , $C$ , $Sc_3C_4$ , $Sc_3Zn_{17}$                  |
| Zn | Ti | Hf | -18.4 | $HfC_{0.875}$ , $Ti_3Zn_3C$ , $Ti_2C$ , $Ti_2Zn$        |
| Zn | V  | Nb | -13.4 | $V_2C$ , $NbZn_3$ , $Nb_6C_5$ , $V_6C_5$                |
| Zn | Y  | Mo | -11.8 | $(Mo_{2/3}Y_{1/3})_2ZnC$ , $YZn$ , $Y_2C$ , $Y_4C_5$    |
| Zn | Fe | Y  | -10.2 | $Fe$ , $C$ , $YZn_3$ , $Y_3C_4$                         |
| Zn | Mo | Zr | -8.3  | $ZrC$ , $Mo$ , $Mo_2C$ , $MoZn_6$                       |
| Zn | W  | Sc | -6.3  | $WC$ , $W$ , $(Sc_{2/3}W_{1/3})_2ZnC$ , $ScZn_3$        |
| Zn | Y  | W  | -5.5  | $YZn$ , $YWC_2$ , $W$ , $YZn_3$                         |
| Zn | Nb | Zr | -3.1  | $Nb_2C$ , $ZrC$ , $ZrZn_3$                              |
| Zn | Cr | Nb | -0.4  | $Zn$ , $Nb_6C_5$ , $Cr_7C_3$ , $Cr_{23}C_6$             |

**Supplementary Table 5.** 291 stable MAX phases with solid solution of  $M'$  and  $M''$ . Synthesized phases in bold.

| A         | $M'$      | $M''$     | $\Delta H_{\text{disorder}}$<br>(meV/atom) | $\Delta G_{\text{disorder}}$<br>(meV/atom) | Equilibrium simplex                                                                                                                  | Status      |
|-----------|-----------|-----------|--------------------------------------------|--------------------------------------------|--------------------------------------------------------------------------------------------------------------------------------------|-------------|
| Ag        | Ti        | Hf        | 46.4                                       | -8.4                                       | TiAg, HfC, TiC <sub>0.75</sub> , Ag                                                                                                  |             |
| Ag        | Ti        | Zr        | 48.5                                       | -6.3                                       | TiC <sub>0.75</sub> , ZrAg, Ag                                                                                                       |             |
| Ag        | Zr        | Ti        | 54.1                                       | -0.7                                       | ZrAg, TiC <sub>0.75</sub> , ZrC <sub>0.875</sub> , Ag                                                                                |             |
| <b>Al</b> | <b>Ta</b> | <b>Ti</b> | -18.3                                      | -73.2                                      | Ta <sub>2</sub> C, TaTi <sub>2</sub> AlC <sub>2</sub> (o-MAX), TiAl <sub>2</sub> , TaAl <sub>3</sub>                                 | synthesized |
| <b>Al</b> | <b>Ti</b> | <b>Ta</b> | -16.5                                      | -71.4                                      | Ti <sub>2</sub> AlC, TaTi <sub>2</sub> AlC <sub>2</sub> (o-MAX), Ta <sub>2</sub> C, TiAl <sub>2</sub>                                | synthesized |
| <b>Al</b> | <b>Ti</b> | <b>Nb</b> | -9.1                                       | -64.0                                      | NbTi <sub>2</sub> AlC <sub>2</sub> (D), Ti <sub>2</sub> AlC, Nb <sub>2</sub> Al, NbAl <sub>3</sub>                                   | synthesized |
| <b>Al</b> | <b>Nb</b> | <b>Ti</b> | -8.5                                       | -63.4                                      | TiNb <sub>2</sub> AlC <sub>2</sub> (o-MAX), Nb <sub>2</sub> Al, NbTi <sub>2</sub> AlC <sub>2</sub> (D), NbAl <sub>3</sub>            | synthesized |
| Al        | Ti        | W         | -6.4                                       | -61.3                                      | WTi <sub>2</sub> AlC <sub>2</sub> (C), C, Ti <sub>3</sub> AlC <sub>2</sub> , TiAl <sub>3</sub>                                       |             |
| <b>Al</b> | <b>V</b>  | <b>Ti</b> | 1.8                                        | -53.1                                      | V <sub>2</sub> AlC, Ti <sub>2</sub> AlC                                                                                              | synthesized |
| <b>Al</b> | <b>Ti</b> | <b>V</b>  | 2.8                                        | -52.1                                      | Ti <sub>2</sub> AlC, V <sub>2</sub> AlC                                                                                              | synthesized |
| <b>Al</b> | <b>Ta</b> | <b>Hf</b> | 4.8                                        | -50.0                                      | HfTa <sub>2</sub> AlC <sub>2</sub> (C), HfAl <sub>2</sub> , Ta <sub>2</sub> C                                                        | synthesized |
| <b>Al</b> | <b>V</b>  | <b>Cr</b> | 4.9                                        | -50.0                                      | V <sub>2</sub> AlC, Cr <sub>2</sub> AlC                                                                                              | synthesized |
| <b>Al</b> | <b>Cr</b> | <b>V</b>  | 8.1                                        | -46.8                                      | Cr <sub>2</sub> AlC, V <sub>2</sub> AlC                                                                                              | synthesized |
| <b>Al</b> | <b>Nb</b> | <b>Zr</b> | 11.2                                       | -43.7                                      | Nb <sub>4</sub> AlC <sub>3</sub> , Zr <sub>5</sub> Al <sub>4</sub> , Nb <sub>2</sub> Al                                              | synthesized |
| Al        | Hf        | Ta        | 11.4                                       | -43.5                                      | Hf <sub>3</sub> AlC <sub>2</sub> , HfAl <sub>2</sub> , Ta <sub>2</sub> C                                                             |             |
| Al        | Nb        | Ta        | 12.5                                       | -42.4                                      | Nb <sub>2</sub> AlC, Ta <sub>2</sub> C, TaNb <sub>2</sub> AlC <sub>2</sub> (o-MAX), NbAl <sub>3</sub>                                |             |
| Al        | V         | W         | 14.8                                       | -40.0                                      | W, WAl <sub>5</sub> , WC, V <sub>1/2</sub> Al <sub>3</sub> C <sub>8</sub>                                                            |             |
| <b>Al</b> | <b>Cr</b> | <b>Mn</b> | 15.0                                       | -39.8                                      | Cr <sub>2</sub> AlC, Mn <sub>3</sub> AlC, MnAl, C                                                                                    | synthesized |
| <b>Al</b> | <b>Zr</b> | <b>Nb</b> | 16.7                                       | -38.2                                      | ZrNb <sub>2</sub> AlC <sub>2</sub> (o-MAX), Zr <sub>4</sub> AlC <sub>3</sub> , ZrAl <sub>2</sub> , Nb <sub>2</sub> Al                | synthesized |
| Al        | Mn        | Cr        | 16.8                                       | -38.0                                      | Cr <sub>2</sub> AlC, Mn <sub>3</sub> AlC, MnAl, C                                                                                    |             |
| Al        | Ta        | V         | 19.6                                       | -35.3                                      | Ta <sub>2</sub> AlC, V <sub>2</sub> AlC                                                                                              |             |
| <b>Al</b> | <b>Nb</b> | <b>Sc</b> | 22.1                                       | -32.8                                      | Sc <sub>3</sub> AlC, NbAl <sub>3</sub> , Nb <sub>12</sub> Al <sub>3</sub> C <sub>8</sub> , Nb <sub>2</sub> AlC                       | synthesized |
| <b>Al</b> | <b>V</b>  | <b>Ta</b> | 22.8                                       | -32.0                                      | V <sub>2</sub> AlC, Ta <sub>2</sub> AlC                                                                                              | synthesized |
| Al        | Ta        | Nb        | 25.1                                       | -29.8                                      | Ta <sub>2</sub> C, NbAl <sub>3</sub> , TaNb <sub>2</sub> AlC <sub>2</sub> (o-MAX), Ta <sub>12</sub> Al <sub>3</sub> C <sub>8</sub>   |             |
| Al        | Ti        | Hf        | 25.8                                       | -29.1                                      | Ti <sub>2</sub> AlC, H <sub>3</sub> AlC <sub>2</sub> , TiAl                                                                          |             |
| Al        | Nb        | Hf        | 26.1                                       | -28.7                                      | Hf <sub>2</sub> Nb <sub>2</sub> AlC <sub>3</sub> , Nb <sub>2</sub> Al, NbAl <sub>3</sub>                                             |             |
| Al        | Ti        | Mo        | 27.9                                       | -26.9                                      | Ti <sub>4</sub> AlC <sub>3</sub> , Mo <sub>3</sub> Al, Mo <sub>3</sub> Al <sub>8</sub>                                               |             |
| <b>Al</b> | <b>Cr</b> | <b>Ti</b> | 28.4                                       | -26.5                                      | TiCr <sub>2</sub> AlC <sub>2</sub> (o-MAX), Cr <sub>2</sub> Al, TiAl <sub>3</sub> , TiC                                              | synthesized |
| Al        | Ta        | Zr        | 29.6                                       | -25.2                                      | ZrAl <sub>2</sub> , ZrC, Ta <sub>2</sub> C, Ta <sub>12</sub> Al <sub>3</sub> C <sub>8</sub>                                          |             |
| Al        | Hf        | Ti        | 30.1                                       | -24.7                                      | Hf <sub>3</sub> AlC <sub>2</sub> , TiAl, Ti <sub>2</sub> AlC                                                                         |             |
| Al        | Zr        | Ta        | 30.2                                       | -24.7                                      | Ta <sub>2</sub> C, Zr <sub>4</sub> AlC <sub>3</sub> , ZrAl <sub>2</sub> , Zr <sub>2</sub> Al <sub>3</sub>                            |             |
| <b>Al</b> | <b>Nb</b> | <b>V</b>  | 31.2                                       | -23.6                                      | Nb <sub>2</sub> AlC, V <sub>2</sub> AlC                                                                                              | synthesized |
| Al        | Ta        | Sc        | 33.4                                       | -21.4                                      | ScTa <sub>2</sub> AlC <sub>2</sub> (C), ScAl <sub>2</sub> , Ta <sub>2</sub> C                                                        |             |
| Al        | Hf        | Nb        | 33.5                                       | -21.3                                      | Hf <sub>4</sub> AlC <sub>3</sub> , Nb <sub>2</sub> Al, NbAl <sub>3</sub>                                                             |             |
| <b>Al</b> | <b>V</b>  | <b>Nb</b> | 33.7                                       | -21.2                                      | V <sub>2</sub> AlC, Nb <sub>2</sub> AlC                                                                                              | synthesized |
| Al        | Cr        | Mo        | 35.6                                       | -19.3                                      | Cr <sub>3</sub> C <sub>2</sub> , Mo <sub>3</sub> Al, Mo <sub>3</sub> Al <sub>8</sub> , C                                             |             |
| Al        | Zr        | Hf        | 36.0                                       | -18.8                                      | HfZr <sub>2</sub> AlC <sub>2</sub> (o-MAX), Zr <sub>2</sub> Al <sub>3</sub> , ZrAl                                                   |             |
| Al        | Mn        | Fe        | 38.7                                       | -16.1                                      | Mn <sub>3</sub> AlC, C, Fe <sub>3</sub> AlC, Fe <sub>5</sub> Al <sub>8</sub>                                                         |             |
| <b>Al</b> | <b>Ti</b> | <b>Cr</b> | 39.8                                       | -15.0                                      | TiC, Cr <sub>2</sub> Al, TiAl <sub>3</sub> , Ti <sub>4</sub> AlC <sub>3</sub>                                                        | synthesized |
| Al        | Hf        | Zr        | 40.8                                       | -14.0                                      | Hf <sub>4</sub> AlC <sub>3</sub> , Zr <sub>2</sub> Al <sub>3</sub> , ZrAl                                                            |             |
| Al        | Mo        | V         | 41.4                                       | -13.5                                      | C, Mo <sub>3</sub> Al, V <sub>6</sub> C <sub>5</sub> , MoAl <sub>12</sub>                                                            |             |
| Al        | Mo        | Cr        | 41.5                                       | -13.3                                      | C, Mo <sub>3</sub> Al, Cr <sub>2</sub> Al, Mo <sub>3</sub> Al <sub>8</sub>                                                           |             |
| <b>Al</b> | <b>Zr</b> | <b>Ti</b> | 44.1                                       | -10.8                                      | Zr <sub>3</sub> AlC <sub>2</sub> , Ti <sub>2</sub> AlC, Zr <sub>4</sub> Al <sub>3</sub> , Zr <sub>2</sub> Al <sub>3</sub>            | synthesized |
| Al        | V         | Mo        | 45.5                                       | -9.4                                       | Mo <sub>3</sub> Al, V <sub>6</sub> C <sub>5</sub> , Mo <sub>3</sub> Al <sub>8</sub> , V <sub>12</sub> Al <sub>3</sub> C <sub>8</sub> |             |
| Al        | Mn        | Mo        | 47.7                                       | -7.2                                       | C, Mn <sub>3</sub> AlC, Mo <sub>3</sub> Al, Mo <sub>3</sub> Al <sub>8</sub>                                                          |             |
| Al        | Mn        | V         | 47.9                                       | -7.0                                       | MnAl, C, V <sub>12</sub> Al <sub>3</sub> C <sub>8</sub> , V <sub>6</sub> C <sub>5</sub>                                              |             |
| Al        | Cr        | Fe        | 49.4                                       | -5.5                                       | Cr <sub>2</sub> AlC, Fe <sub>3</sub> AlC, C, Fe <sub>5</sub> Al <sub>8</sub>                                                         |             |
| Al        | W         | Ti        | 50.2                                       | -4.6                                       | C, Ti <sub>2</sub> W <sub>2</sub> AlC <sub>3</sub> (o-MAX), WAl <sub>5</sub>                                                         |             |
| Al        | Mo        | Mn        | 50.9                                       | -4.0                                       | C, Mo <sub>3</sub> Al, Mn <sub>3</sub> AlC, Mo <sub>3</sub> Al <sub>8</sub>                                                          |             |
| Al        | Cr        | W         | 52.8                                       | -2.0                                       | Cr <sub>2</sub> AlC, WC, W, WAl <sub>5</sub>                                                                                         |             |
| Al        | Mo        | Nb        | 54.6                                       | -0.3                                       | C, Mo <sub>3</sub> Al, Nb <sub>6</sub> C <sub>5</sub> , Mo <sub>3</sub> Al <sub>8</sub>                                              |             |
| Au        | Nb        | Ta        | 1.1                                        | -53.8                                      | NbAu <sub>2</sub> , Ta <sub>2</sub> C, Nb <sub>6</sub> C <sub>5</sub> , Nb <sub>2</sub> C                                            |             |
| Au        | Ta        | Nb        | 3.7                                        | -51.1                                      | Ta <sub>2</sub> C, Au, NbAu <sub>2</sub> , Nb <sub>6</sub> C <sub>5</sub>                                                            |             |
| Au        | V         | Ta        | 17.8                                       | -37.1                                      | V <sub>2</sub> AuC, Ta <sub>2</sub> C, Au                                                                                            |             |
| Au        | Ta        | V         | 18.8                                       | -36.0                                      | Ta <sub>2</sub> C, Au, V <sub>2</sub> AuC                                                                                            |             |
| Au        | Nb        | V         | 23.8                                       | -31.1                                      | Nb <sub>2</sub> AuC, V <sub>2</sub> AuC                                                                                              |             |
| Au        | Ti        | Nb        | 24.6                                       | -30.2                                      | TiAu <sub>2</sub> , Ti <sub>3</sub> AuC <sub>2</sub> , Nb <sub>2</sub> C                                                             |             |
| Au        | V         | Nb        | 24.7                                       | -30.1                                      | V <sub>2</sub> AuC, Nb <sub>2</sub> AuC                                                                                              |             |
| Au        | Ti        | Ta        | 27.9                                       | -27.0                                      | TiAu <sub>2</sub> , Ti <sub>2</sub> AuC <sub>2</sub> , Ta <sub>2</sub> C                                                             |             |
| Au        | Nb        | Ti        | 28.6                                       | -26.3                                      | TiAu <sub>2</sub> , Nb <sub>2</sub> C, Nb <sub>6</sub> C <sub>5</sub> , Ti <sub>3</sub> AuC <sub>2</sub>                             |             |
| Au        | Ti        | V         | 31.2                                       | -23.6                                      | TiAu <sub>2</sub> , Ti <sub>3</sub> AuC <sub>2</sub> , V <sub>2</sub> C                                                              |             |
| Au        | Zr        | Hf        | 32.4                                       | -22.4                                      | HfC, ZrC <sub>0.875</sub> , ZrAu <sub>2</sub> , Zr <sub>2</sub> Au                                                                   |             |
| Au        | Ta        | Ti        | 33.1                                       | -21.7                                      | TiAu <sub>2</sub> , Ta <sub>2</sub> C, Ta <sub>4</sub> C <sub>3</sub> , Ti <sub>3</sub> AuC <sub>2</sub>                             |             |
| Au        | V         | Ti        | 34.6                                       | -20.2                                      | TiAu <sub>2</sub> , V <sub>2</sub> C, Ti <sub>3</sub> AuC <sub>2</sub> , V <sub>6</sub> C <sub>5</sub>                               |             |
| Au        | Ti        | Hf        | 38.1                                       | -16.7                                      | HfC, Ti <sub>3</sub> AuC <sub>2</sub> , HfAu <sub>2</sub> , Ti <sub>3</sub> Au                                                       |             |
| Au        | Zr        | Ti        | 38.9                                       | -15.9                                      | ZrC <sub>0.875</sub> , ZrAu <sub>2</sub> , TiC <sub>0.75</sub> , Ti <sub>3</sub> Au                                                  |             |
| Au        | Hf        | Zr        | 41.6                                       | -13.2                                      | HfC, HfAu, ZrAu <sub>2</sub> , Zr <sub>2</sub> Au                                                                                    |             |
| Au        | Hf        | Ti        | 46.3                                       | -8.6                                       | HfC, HfAu <sub>2</sub> , Ti <sub>3</sub> Au, Ti <sub>3</sub> AuC <sub>2</sub>                                                        |             |
| Au        | V         | Cr        | 49.7                                       | -5.2                                       | Au, Cr, V <sub>2</sub> C, V <sub>6</sub> C <sub>5</sub>                                                                              |             |
| Au        | V         | Mo        | 51.3                                       | -3.5                                       | Au, Mo, V <sub>2</sub> C, V <sub>6</sub> C <sub>5</sub>                                                                              |             |
| Au        | Hf        | Nb        | 51.9                                       | -2.9                                       | HfC, HfAu <sub>2</sub> , HfAu, Nb <sub>2</sub> C                                                                                     |             |
| Au        | Ti        | Mo        | 52.0                                       | -2.9                                       | Ti <sub>3</sub> AuC <sub>2</sub> , Mo, Mo <sub>2</sub> C, TiAu <sub>4</sub>                                                          |             |
| Au        | Ta        | Mo        | 52.5                                       | -2.3                                       | Au, Mo, Ta <sub>4</sub> C <sub>3</sub>                                                                                               |             |
| Au        | Zr        | Nb        | 52.7                                       | -2.2                                       | ZrC <sub>0.875</sub> , ZrAu <sub>2</sub> , Nb <sub>2</sub> C, Zr <sub>2</sub> Au                                                     |             |

|           |           |           |       |       |                                                                                                                                            |             |
|-----------|-----------|-----------|-------|-------|--------------------------------------------------------------------------------------------------------------------------------------------|-------------|
| Au        | Nb        | Mo        | 53.1  | -1.7  | Au, Mo, Nb <sub>6</sub> C <sub>5</sub> , NbAu <sub>2</sub>                                                                                 |             |
| Ga        | Ta        | Ti        | -36.9 | -91.8 | Ta <sub>2</sub> GaC, Ti <sub>2</sub> GaC                                                                                                   |             |
| Ga        | Ti        | Ta        | -35.3 | -90.2 | Ti <sub>2</sub> GaC, Ta <sub>2</sub> GaC                                                                                                   |             |
| Ga        | Ti        | W         | -24.7 | -79.5 | W, Ti <sub>3</sub> GaC <sub>2</sub> , WC, TiGa <sub>3</sub>                                                                                |             |
| Ga        | Ti        | Nb        | -19.1 | -73.9 | Ti <sub>2</sub> GaC, Nb <sub>2</sub> GaC                                                                                                   |             |
| Ga        | Nb        | Ti        | -18.9 | -73.7 | Nb <sub>2</sub> GaC, Ti <sub>2</sub> GaC                                                                                                   |             |
| Ga        | Sc        | Ta        | -14.3 | -69.2 | TaC, ScGa <sub>2</sub> , Sc <sub>3</sub> GaC                                                                                               |             |
| Ga        | Ta        | Hf        | -13.6 | -68.4 | Ta <sub>2</sub> GaC, HfGa <sub>2</sub> , Hf <sub>3</sub> GaC <sub>2</sub> , Ta <sub>2</sub> C                                              |             |
| Ga        | Nb        | Sc        | -13.0 | -67.9 | (Sc <sub>2/3</sub> Nb <sub>1/3</sub> ) <sub>2</sub> GaC, Nb <sub>2</sub> GaC                                                               |             |
| Ga        | Hf        | Ta        | -10.9 | -65.8 | HfGa <sub>2</sub> , Hf <sub>3</sub> GaC <sub>2</sub> , Ta <sub>2</sub> C                                                                   |             |
| Ga        | Ti        | Mo        | -8.0  | -62.9 | Ti <sub>3</sub> GaC <sub>2</sub> , Ti <sub>2</sub> MoGaC <sub>2</sub> (o-MAX), Mo <sub>3</sub> Ga, MoGa <sub>4</sub>                       |             |
| Ga        | Sc        | Nb        | -7.7  | -62.6 | (Nb <sub>2/3</sub> Sc <sub>1/3</sub> ) <sub>2</sub> GaC, Sc <sub>3</sub> GaC, ScGa <sub>2</sub> , Sc <sub>3</sub> C <sub>4</sub>           |             |
| Ga        | Nb        | Zr        | -2.9  | -57.8 | Nb <sub>2</sub> GaC, ZrGa, Zr <sub>3</sub> GaC <sub>2</sub>                                                                                |             |
| Ga        | Ti        | V         | -2.6  | -57.5 | Ti <sub>2</sub> GaC, V <sub>2</sub> GaC                                                                                                    |             |
| Ga        | V         | Ti        | -2.0  | -56.8 | V <sub>2</sub> GaC, Ti <sub>2</sub> GaC                                                                                                    |             |
| Ga        | Ta        | Nb        | -2.0  | -56.8 | Ta <sub>2</sub> GaC, Nb <sub>2</sub> GaC                                                                                                   |             |
| Ga        | Nb        | Ta        | -1.9  | -56.8 | Nb <sub>2</sub> GaC, Ta <sub>2</sub> GaC                                                                                                   |             |
| Ga        | Nb        | Hf        | -1.8  | -56.7 | Nb <sub>2</sub> GaC, Hf <sub>3</sub> GaC <sub>2</sub> , Nb <sub>5</sub> Ga <sub>4</sub> , Nb <sub>5</sub> Ga <sub>13</sub>                 |             |
| Ga        | Zr        | Nb        | 1.6   | -53.3 | Nb <sub>2</sub> GaC, ZrGa, Zr <sub>3</sub> GaC <sub>2</sub>                                                                                |             |
| Ga        | Ta        | Sc        | 6.2   | -48.7 | ScGa <sub>2</sub> , (Sc <sub>2/3</sub> Ta <sub>1/3</sub> ) <sub>2</sub> GaC, Ta <sub>2</sub> C, Ta <sub>4</sub> C <sub>3</sub>             |             |
| Ga        | Hf        | Nb        | 6.4   | -48.4 | Hf <sub>3</sub> GaC <sub>2</sub> , Nb <sub>2</sub> GaC, Nb <sub>5</sub> Ga <sub>4</sub> , Nb <sub>5</sub> Ga <sub>13</sub>                 |             |
| Ga        | V         | Cr        | 6.5   | -48.3 | V <sub>2</sub> GaC, Cr <sub>2</sub> GaC                                                                                                    |             |
| Ga        | Cr        | V         | 8.2   | -46.7 | Cr <sub>2</sub> GaC, V <sub>2</sub> GaC                                                                                                    |             |
| Ga        | V         | Mo        | 8.9   | -46.0 | V <sub>6</sub> C <sub>5</sub> , V <sub>2</sub> GaC, MoGa <sub>4</sub> , Mo <sub>3</sub> Ga                                                 |             |
| Ga        | Ta        | Zr        | 10.7  | -44.2 | Ta <sub>4</sub> C <sub>3</sub> , Zr <sub>3</sub> Ga <sub>5</sub> , Ta <sub>2</sub> C, Zr <sub>3</sub> GaC <sub>2</sub>                     |             |
| Ga        | Zr        | Ta        | 10.7  | -44.2 | Zr <sub>3</sub> GaC <sub>2</sub> , Ta <sub>2</sub> C, Zr <sub>3</sub> Ga <sub>5</sub> , Ta <sub>4</sub> C <sub>3</sub>                     |             |
| <b>Ga</b> | <b>Mn</b> | <b>Cr</b> | 11.9  | -43.0 | Mn <sub>2</sub> GaC, Cr <sub>2</sub> GaC                                                                                                   | synthesized |
| Ga        | Cr        | Ti        | 14.2  | -40.7 | Cr <sub>2</sub> GaC, Ti <sub>3</sub> GaC <sub>2</sub> , CrGa <sub>4</sub> , Cr <sub>23</sub> C <sub>6</sub>                                |             |
| Ga        | Mo        | V         | 14.2  | -40.7 | Mo <sub>2</sub> Ga <sub>2</sub> C, Mo <sub>3</sub> Ga, V <sub>6</sub> C <sub>5</sub> , Mo <sub>2</sub> C                                   |             |
| <b>Ga</b> | <b>Cr</b> | <b>Mn</b> | 14.8  | -40.0 | Cr <sub>2</sub> GaC, Mn <sub>2</sub> GaC                                                                                                   | synthesized |
| Ga        | Ta        | V         | 16.7  | -38.2 | Ta <sub>2</sub> GaC, V <sub>2</sub> GaC                                                                                                    |             |
| Ga        | Hf        | Ti        | 18.8  | -36.0 | Hf <sub>2</sub> GaC, Ti <sub>2</sub> GaC                                                                                                   |             |
| Ga        | V         | Ta        | 18.9  | -36.0 | V <sub>2</sub> GaC, Ta <sub>2</sub> GaC                                                                                                    |             |
| Ga        | Ti        | Hf        | 19.0  | -35.8 | Ti <sub>2</sub> GaC, Hf <sub>2</sub> GaC                                                                                                   |             |
| Ga        | Ti        | Cr        | 19.1  | -35.7 | Ti <sub>3</sub> GaC <sub>2</sub> , CrGa <sub>4</sub> , Cr, Cr <sub>23</sub> C <sub>6</sub>                                                 |             |
| Ga        | Mo        | Nb        | 22.8  | -32.0 | Mo <sub>2</sub> Ga <sub>2</sub> C, Nb <sub>4</sub> GaC <sub>3</sub> , Mo <sub>2</sub> C, Mo <sub>3</sub> Ga                                |             |
| Ga        | Cr        | Mo        | 24.8  | -30.1 | Cr <sub>2</sub> GaC, Mo <sub>2</sub> Ga <sub>2</sub> C, Mo <sub>2</sub> C                                                                  |             |
| Ga        | Nb        | Mo        | 25.2  | -29.7 | Nb <sub>4</sub> GaC <sub>3</sub> , Mo <sub>3</sub> Ga, MoGa <sub>4</sub>                                                                   |             |
| Ga        | Mo        | Cr        | 26.5  | -28.4 | Mo <sub>2</sub> Ga <sub>2</sub> C, Cr <sub>2</sub> GaC, Mo <sub>2</sub> C                                                                  |             |
| Ga        | Mn        | V         | 26.6  | -28.2 | Mn <sub>2</sub> GaC, V <sub>2</sub> GaC                                                                                                    |             |
| Ga        | V         | W         | 26.8  | -28.0 | V <sub>2</sub> GaC, WC, W                                                                                                                  |             |
| Ga        | V         | Mn        | 27.0  | -27.9 | V <sub>2</sub> GaC, Mn <sub>2</sub> GaC                                                                                                    |             |
| Ga        | Nb        | V         | 28.5  | -26.3 | Nb <sub>2</sub> GaC, V <sub>2</sub> GaC                                                                                                    |             |
| Ga        | V         | Nb        | 30.6  | -24.3 | V <sub>2</sub> GaC, Nb <sub>2</sub> GaC                                                                                                    |             |
| Ga        | Mo        | Ti        | 31.6  | -23.2 | Mo <sub>2</sub> TiGaC <sub>2</sub> (o-MAX), (Ti <sub>2/3</sub> Mo <sub>1/3</sub> ) <sub>2</sub> GaC, Mo <sub>3</sub> Ga, MoGa <sub>4</sub> |             |
| Ga        | Zr        | Hf        | 32.6  | -22.2 | ZrGa, HfC, Zr <sub>3</sub> GaC <sub>2</sub>                                                                                                |             |
| <b>Ga</b> | <b>Mn</b> | <b>Mo</b> | 32.9  | -21.9 | Mn <sub>2</sub> GaC, Mo <sub>2</sub> Ga <sub>2</sub> C, Mo <sub>2</sub> C                                                                  | synthesized |
| Ga        | Mn        | Fe        | 34.2  | -20.6 | Mn <sub>2</sub> GaC, C, Fe <sub>3</sub> Ga, FeGa <sub>3</sub>                                                                              |             |
| <b>Ga</b> | <b>Mo</b> | <b>Mn</b> | 34.3  | -20.6 | Mn <sub>2</sub> GaC, Mo <sub>2</sub> Ga <sub>2</sub> C, Mo <sub>2</sub> C                                                                  | synthesized |
| Ga        | Ti        | Zr        | 36.8  | -18.0 | ZrGa, Ti <sub>3</sub> GaC <sub>2</sub> , Zr <sub>3</sub> GaC <sub>2</sub>                                                                  |             |
| Ga        | Hf        | Zr        | 40.7  | -14.1 | ZrGa, Hf <sub>4</sub> GaC <sub>3</sub>                                                                                                     |             |
| Ga        | Zr        | Ti        | 42.1  | -12.8 | ZrGa, Zr <sub>3</sub> GaC <sub>2</sub> , Ti <sub>3</sub> GaC <sub>2</sub>                                                                  |             |
| Ga        | Ta        | Mo        | 45.6  | -9.2  | Ta <sub>4</sub> C <sub>3</sub> , Mo <sub>3</sub> Ga, MoGa <sub>4</sub>                                                                     |             |
| Ga        | Mo        | Ta        | 46.7  | -8.1  | TaC, Mo <sub>2</sub> Ga <sub>2</sub> C, Mo <sub>3</sub> Ga, MoGa <sub>4</sub>                                                              |             |
| Ga        | Nb        | W         | 49.4  | -5.5  | Nb <sub>2</sub> GaC, WC, W, Nb <sub>5</sub> Ga <sub>13</sub>                                                                               |             |
| Ga        | Ta        | W         | 49.7  | -5.1  | Ta <sub>2</sub> GaC, WC, W, Ga                                                                                                             |             |
| Ga        | Hf        | V         | 53.8  | -1.0  | Hf <sub>2</sub> GaC, V <sub>2</sub> GaC                                                                                                    |             |
| Ge        | Sc        | Nb        | -21.3 | -76.2 | ScGe, C, Nb <sub>6</sub> C <sub>5</sub> , Sc <sub>3</sub> GeC                                                                              |             |
| Ge        | Ti        | Ta        | -18.9 | -73.8 | Ti <sub>2</sub> GeC, Ta <sub>2</sub> GeC                                                                                                   |             |
| Ge        | Ta        | Ti        | -12.5 | -67.3 | Ta <sub>2</sub> GeC, Ti <sub>2</sub> GeC                                                                                                   |             |
| Ge        | Sc        | Ta        | -9.4  | -64.2 | ScGe, TaC, Sc <sub>3</sub> GeC, C                                                                                                          |             |
| Ge        | Hf        | Ta        | -1.6  | -56.5 | Hf <sub>2</sub> GeC, Ta <sub>2</sub> GeC                                                                                                   |             |
| Ge        | Ti        | Nb        | 0.0   | -54.8 | Ti <sub>2</sub> GeC, NbGe <sub>2</sub> , Nb <sub>5</sub> Ge <sub>3</sub> C                                                                 |             |
| Ge        | Ta        | Hf        | 2.4   | -52.4 | Ta <sub>2</sub> GeC, Hf <sub>2</sub> GeC                                                                                                   |             |
| Ge        | Nb        | Sc        | 2.5   | -52.4 | (Sc <sub>2/3</sub> Nb <sub>1/3</sub> ) <sub>2</sub> GeC, Nb <sub>4</sub> GeC <sub>3</sub>                                                  |             |
| Ge        | Nb        | Ti        | 2.5   | -52.4 | Nb <sub>2</sub> GeC, Ti <sub>3</sub> GeC <sub>2</sub> , NbGe <sub>2</sub> , Nb <sub>5</sub> Ge <sub>3</sub> C                              |             |
| <b>Ge</b> | <b>V</b>  | <b>Ti</b> | 5.8   | -49.1 | V <sub>2</sub> GeC, Ti <sub>2</sub> GeC                                                                                                    | synthesized |
| <b>Ge</b> | <b>Ti</b> | <b>V</b>  | 6.2   | -48.6 | Ti <sub>2</sub> GeC, V <sub>2</sub> GeC                                                                                                    | synthesized |
| Ge        | Zr        | Nb        | 8.9   | -45.9 | ZrGe, ZrC, ZrGe <sub>2</sub> , Nb <sub>6</sub> C <sub>5</sub>                                                                              |             |
| Ge        | Ti        | Mo        | 10.2  | -44.6 | Ti <sub>3</sub> GeC <sub>2</sub> , MoGe <sub>2</sub> , Mo <sub>2</sub> C, Mo <sub>3</sub> Ge                                               |             |
| Ge        | Nb        | Zr        | 10.3  | -44.5 | ZrGe, ZrGe <sub>2</sub> , Nb <sub>6</sub> C <sub>5</sub> , Nb <sub>2</sub> GeC                                                             |             |
| Ge        | Nb        | Ta        | 11.4  | -43.5 | TaC, Nb <sub>2</sub> GeC, NbGe <sub>2</sub> , Nb <sub>5</sub> Ge <sub>3</sub> C                                                            |             |
| <b>Ge</b> | <b>Cr</b> | <b>V</b>  | 11.6  | -43.3 | Cr <sub>2</sub> GeC, Ge, Cr <sub>3</sub> Ge, V <sub>6</sub> C <sub>5</sub>                                                                 | synthesized |
| <b>Ge</b> | <b>V</b>  | <b>Cr</b> | 11.9  | -43.0 | Ge, Cr <sub>3</sub> Ge, V <sub>2</sub> GeC, V <sub>6</sub> C <sub>5</sub>                                                                  | synthesized |
| Ge        | Ta        | Sc        | 14.3  | -40.5 | ScGe, Ge, Ta <sub>4</sub> C <sub>3</sub>                                                                                                   |             |
| Ge        | Ti        | W         | 15.9  | -38.9 | Ti <sub>2</sub> GeC, WC, W, Ge                                                                                                             |             |
| Ge        | Ta        | V         | 16.3  | -38.6 | Ta <sub>2</sub> GeC, V <sub>2</sub> GeC                                                                                                    |             |
| Ge        | V         | Ta        | 17.5  | -37.4 | V <sub>2</sub> GeC, Ta <sub>2</sub> GeC                                                                                                    |             |
| Ge        | Mo        | Ti        | 18.0  | -36.9 | Mo <sub>2</sub> C, MoGe <sub>2</sub> , Ti <sub>3</sub> GeC <sub>2</sub> , C                                                                |             |
| Ge        | Ta        | Nb        | 18.4  | -36.5 | NbGe <sub>2</sub> , Ta <sub>4</sub> C <sub>3</sub> , Ta <sub>2</sub> GeC, Nb <sub>5</sub> Ge <sub>3</sub> C <sub>5</sub>                   |             |



|           |           |           |       |       |                                                                                                                                      |             |
|-----------|-----------|-----------|-------|-------|--------------------------------------------------------------------------------------------------------------------------------------|-------------|
| Ge        | Hf        | Ti        | 19.6  | -35.3 | Hf <sub>2</sub> GeC, Ti <sub>2</sub> GeC                                                                                             |             |
| Ge        | Ti        | Hf        | 19.8  | -35.1 | Ti <sub>2</sub> GeC, Hf <sub>2</sub> GeC                                                                                             |             |
| Ge        | Cr        | Ti        | 24.3  | -30.5 | Cr <sub>2</sub> GeC, Ti <sub>3</sub> GeC <sub>2</sub> , Ge, Cr <sub>3</sub> Ge                                                       |             |
| Ge        | Sc        | Zr        | 24.3  | -30.5 | ScGe, ZrC, Sc <sub>3</sub> GeC, C                                                                                                    |             |
| Ge        | Zr        | Sc        | 24.6  | -30.3 | ZrC, ScGe, ZrGe                                                                                                                      |             |
| Ge        | Nb        | V         | 28.4  | -26.4 | Nb <sub>2</sub> GeC, V <sub>2</sub> GeC                                                                                              |             |
| Ge        | V         | Nb        | 29.3  | -25.5 | V <sub>2</sub> GeC, Nb <sub>2</sub> GeC                                                                                              |             |
| Ge        | Nb        | Hf        | 29.5  | -25.3 | HfC, NbGe <sub>2</sub> , Nb <sub>5</sub> Ge <sub>3</sub> C, Nb <sub>2</sub> GeC                                                      |             |
| Ge        | Zr        | Ta        | 30.1  | -24.8 | ZrGe, TaC, ZrC                                                                                                                       |             |
| <b>Ge</b> | <b>Cr</b> | <b>Mn</b> | 30.7  | -24.1 | MnGe, Cr <sub>3</sub> C <sub>2</sub> , Ge, C                                                                                         | synthesized |
| Ge        | Zr        | Mo        | 31.5  | -23.3 | ZrC, ZrGe <sub>2</sub> , Mo <sub>3</sub> Ge, MoGe <sub>2</sub>                                                                       |             |
| Ge        | Nb        | Mo        | 31.9  | -23.0 | MoGe <sub>2</sub> , Nb <sub>6</sub> C <sub>5</sub> , Nb <sub>2</sub> GeC, Mo <sub>3</sub> Ge                                         |             |
| Ge        | Sc        | Ti        | 32.0  | -22.8 | ScGe, TiC, Sc <sub>3</sub> GeC, C                                                                                                    |             |
| <b>Ge</b> | <b>Ti</b> | <b>Cr</b> | 34.5  | -20.4 | Ti <sub>3</sub> GeC <sub>2</sub> , Ge, Cr <sub>3</sub> Ge, Cr <sub>2</sub> GeC                                                       | synthesized |
| Ge        | Hf        | Nb        | 35.3  | -19.6 | HfC, NbGe <sub>2</sub> , Hf <sub>2</sub> Nb <sub>3</sub> Ge <sub>4</sub>                                                             |             |
| Ge        | Zr        | Ti        | 39.9  | -15.0 | ZrGe, ZrC, Ti <sub>3</sub> GeC <sub>2</sub>                                                                                          |             |
| Ge        | Hf        | Zr        | 40.6  | -14.2 | HfC, ZrGe, Hf <sub>2</sub> GeC                                                                                                       |             |
| Ge        | Zr        | Hf        | 42.4  | -12.5 | ZrGe <sub>2</sub> , HfC, ZrC                                                                                                         |             |
| Ge        | V         | Mo        | 42.6  | -12.3 | MoGe <sub>2</sub> , V <sub>2</sub> GeC, V <sub>6</sub> C <sub>5</sub> , Mo <sub>3</sub> Ge                                           |             |
| Ge        | Mn        | Cr        | 43.1  | -11.7 | MnGe, C, Cr <sub>3</sub> C <sub>2</sub> , Mn <sub>3</sub> GeC                                                                        |             |
| Ge        | V         | Mn        | 43.7  | -11.2 | MnGe, V <sub>2</sub> GeC, V <sub>6</sub> C <sub>5</sub> , Ge                                                                         |             |
| Ge        | Mo        | Nb        | 44.1  | -10.8 | MoC, MoGe <sub>2</sub> , Mo <sub>3</sub> Ge, Nb <sub>6</sub> C <sub>5</sub>                                                          |             |
| Ge        | Mo        | Zr        | 45.1  | -9.8  | ZrC, MoGe <sub>2</sub> , Mo <sub>2</sub> C, Mo <sub>3</sub> Ge                                                                       |             |
| Ge        | Ti        | Zr        | 48.7  | -6.2  | ZrGe, Ti <sub>3</sub> GeC <sub>2</sub> , ZrC                                                                                         |             |
| Ge        | Sc        | Hf        | 50.8  | -4.1  | ScGe, HfC, Sc <sub>3</sub> GeC, C                                                                                                    |             |
| Ge        | Ta        | Zr        | 51.2  | -3.7  | Ta <sub>4</sub> C <sub>3</sub> , ZrGe, ZrGe <sub>2</sub>                                                                             |             |
| Ge        | Hf        | Sc        | 52.3  | -2.6  | ScGe, HfC, Hf <sub>2</sub> GeC,                                                                                                      |             |
| Ge        | Ti        | Sc        | 52.7  | -2.1  | ScGe, Ti <sub>4</sub> GeC <sub>3</sub>                                                                                               |             |
| Ge        | Nb        | Cr        | 53.2  | -1.6  | Nb <sub>2</sub> GeC, NbGe <sub>2</sub> , Cr <sub>3</sub> C <sub>2</sub>                                                              |             |
| Ge        | Mo        | V         | 54.4  | -0.5  | MoGe <sub>2</sub> , Mo <sub>2</sub> C, V <sub>6</sub> C <sub>5</sub> , C                                                             |             |
| In        | Nb        | Sc        | -15.5 | -70.4 | Nb <sub>2</sub> InC, ScIn <sub>2</sub> , Sc <sub>3</sub> InC, Nb <sub>6</sub> C <sub>5</sub>                                         |             |
| In        | Nb        | Ti        | -12.9 | -67.7 | Nb <sub>2</sub> InC, Ti <sub>2</sub> InC                                                                                             |             |
| In        | Ti        | Nb        | -11.9 | -66.8 | Ti <sub>2</sub> InC, Nb <sub>2</sub> InC                                                                                             |             |
| In        | Nb        | Hf        | -4.9  | -59.8 | Nb <sub>2</sub> InC, Hf <sub>2</sub> InC                                                                                             |             |
| In        | Ti        | Ta        | -3.5  | -58.3 | Ti <sub>2</sub> InC, Ta <sub>2</sub> C, In                                                                                           |             |
| In        | Hf        | Nb        | -2.6  | -57.5 | Hf <sub>2</sub> InC, Nb <sub>2</sub> InC                                                                                             |             |
| In        | Nb        | Zr        | -2.5  | -57.3 | Nb <sub>2</sub> InC, Zr <sub>2</sub> InC                                                                                             |             |
| In        | Zr        | Nb        | -0.2  | -55.0 | Zr <sub>2</sub> InC, Nb <sub>2</sub> InC                                                                                             |             |
| In        | Sc        | Mo        | 0.2   | -54.6 | (Mo <sub>2/3</sub> Sc <sub>1/3</sub> ) <sub>2</sub> InC, Sc <sub>2</sub> MoInC <sub>2</sub> , Sc <sub>3</sub> InC, ScIn <sub>3</sub> |             |
| In        | Zr        | Hf        | 0.5   | -54.4 | Zr <sub>2</sub> InC, Hf <sub>2</sub> InC                                                                                             |             |
| In        | Hf        | Zr        | 0.5   | -54.3 | Hf <sub>2</sub> InC, Zr <sub>2</sub> InC                                                                                             |             |
| In        | Ti        | V         | 2.1   | -52.8 | Ti <sub>2</sub> InC, V <sub>2</sub> C, In                                                                                            |             |
| In        | Sc        | Nb        | 3.0   | -51.9 | Sc <sub>3</sub> InC, ScIn <sub>3</sub> , Nb <sub>6</sub> C <sub>5</sub> , C                                                          |             |
| In        | V         | Ti        | 7.0   | -47.8 | V <sub>2</sub> C, In, Ti <sub>2</sub> InC                                                                                            |             |
| In        | Ti        | Mo        | 15.0  | -39.9 | In, Ti <sub>3</sub> InC <sub>2</sub> , Mo, Mo <sub>2</sub> C                                                                         |             |
| In        | Hf        | Ta        | 15.6  | -39.2 | Hf <sub>2</sub> InC, Ta <sub>2</sub> C, In                                                                                           |             |
| In        | Sc        | Ta        | 15.7  | -39.1 | TaC, Sc <sub>3</sub> InC, ScIn <sub>3</sub> , Ta <sub>4</sub> C <sub>3</sub>                                                         |             |
| In        | Zr        | Ta        | 16.2  | -38.7 | Zr <sub>2</sub> InC, Ta <sub>2</sub> C, In                                                                                           |             |
| <b>In</b> | <b>Hf</b> | <b>Ti</b> | 17.1  | -37.8 | Hf <sub>2</sub> InC, Ti <sub>2</sub> InC                                                                                             | synthesized |
| <b>In</b> | <b>Ti</b> | <b>Hf</b> | 17.3  | -37.5 | Ti <sub>2</sub> InC, Hf <sub>2</sub> InC                                                                                             | synthesized |
| In        | Ta        | Ti        | 18.1  | -36.7 | Ta <sub>2</sub> C, In, Ti <sub>2</sub> InC                                                                                           |             |
| In        | Nb        | Ta        | 20.5  | -34.4 | Nb <sub>2</sub> InC, Ta <sub>2</sub> C, In                                                                                           |             |
| In        | Nb        | V         | 24.0  | -30.9 | Nb <sub>2</sub> InC, V <sub>2</sub> C, In                                                                                            |             |
| In        | Zr        | Sc        | 26.6  | -28.2 | Zr <sub>2</sub> InC, ZrC, ScIn <sub>2</sub> , Sc <sub>3</sub> InC                                                                    |             |
| In        | V         | Nb        | 27.5  | -27.3 | V <sub>2</sub> C, In, Nb <sub>2</sub> InC                                                                                            |             |
| <b>In</b> | <b>Zr</b> | <b>Ti</b> | 28.8  | -26.1 | Zr <sub>2</sub> InC, Ti <sub>2</sub> InC                                                                                             | synthesized |
| <b>In</b> | <b>Ti</b> | <b>Zr</b> | 29.4  | -25.4 | Ti <sub>2</sub> InC, Zr <sub>2</sub> InC                                                                                             | synthesized |
| In        | Ta        | Sc        | 30.4  | -24.4 | ScIn <sub>2</sub> , Ta <sub>4</sub> C <sub>3</sub> , Ta <sub>2</sub> C, Sc <sub>3</sub> InC                                          |             |
| In        | Mo        | Sc        | 36.6  | -18.3 | (Sc <sub>2/3</sub> Mo <sub>1/3</sub> ) <sub>2</sub> InC, Mo <sub>2</sub> C, In                                                       |             |
| In        | Ta        | Hf        | 36.8  | -18.0 | Ta <sub>2</sub> C, In, Hf <sub>2</sub> InC                                                                                           |             |
| In        | Ta        | Zr        | 37.4  | -17.4 | Ta <sub>2</sub> C, In, Zr <sub>2</sub> InC                                                                                           |             |
| In        | Zr        | Mo        | 38.7  | -16.1 | ZrC, In, Mo, Zr <sub>2</sub> InC                                                                                                     |             |
| In        | Hf        | Sc        | 39.0  | -15.9 | Hf <sub>2</sub> InC, HfC, Sc <sub>3</sub> InC, ScIn <sub>2</sub>                                                                     |             |
| In        | Mo        | Ti        | 39.9  | -14.9 | In, Mo <sub>2</sub> C, Ti <sub>3</sub> InC <sub>2</sub> , Mo                                                                         |             |
| In        | V         | Ta        | 40.0  | -14.9 | In, V <sub>2</sub> C, Ta <sub>2</sub> C                                                                                              |             |
| In        | Ta        | Nb        | 44.1  | -10.8 | Ta <sub>2</sub> C, In, Nb <sub>2</sub> InC                                                                                           |             |
| In        | Sc        | Zr        | 49.9  | -4.9  | ZrC, ScIn <sub>2</sub> , Sc <sub>3</sub> InC                                                                                         |             |
| In        | Hf        | V         | 52.2  | -2.7  | Hf <sub>2</sub> InC, V <sub>2</sub> C, In                                                                                            |             |
| In        | Nb        | Mo        | 52.5  | -2.3  | In, Mo, Nb <sub>2</sub> InC, Nb <sub>6</sub> C <sub>5</sub>                                                                          |             |
| Pd        | V         | Cr        | 36.5  | -18.3 | VPd <sub>3</sub> , V <sub>6</sub> C <sub>5</sub> , Cr <sub>23</sub> C <sub>6</sub> , Cr                                              |             |
| Pd        | Cr        | V         | 39.9  | -15.0 | VPd <sub>3</sub> , Cr <sub>3</sub> C <sub>2</sub> , Cr <sub>7</sub> C <sub>3</sub> , V <sub>6</sub> C <sub>5</sub>                   |             |
| Pd        | Ti        | V         | 42.4  | -12.5 | TiC <sub>0.75</sub> , TiPd <sub>2</sub> , V <sub>2</sub> C, TiC <sub>0.875</sub>                                                     |             |
| Pd        | Ti        | Ta        | 43.7  | -11.1 | TiPd <sub>2</sub> , TiC <sub>0.75</sub> , Ta <sub>2</sub> C, TiC <sub>0.875</sub>                                                    |             |
| Pd        | Ti        | Nb        | 46.8  | -8.1  | TiC <sub>0.75</sub> , TiPd <sub>2</sub> , TiC <sub>0.875</sub> , Nb <sub>2</sub> C                                                   |             |
| Pd        | V         | Mo        | 47.8  | -7.1  | VPd <sub>3</sub> , Mo, Mo <sub>2</sub> C, V <sub>6</sub> C <sub>5</sub>                                                              |             |
| Pt        | V         | Cr        | 14.5  | -40.4 | VPt <sub>2</sub> , V <sub>6</sub> C <sub>5</sub> , Cr <sub>7</sub> C <sub>3</sub> , Cr <sub>3</sub> C <sub>2</sub>                   |             |
| Pt        | Cr        | V         | 23.6  | -31.3 | VPt <sub>2</sub> , Cr <sub>3</sub> C <sub>2</sub> , V <sub>6</sub> C <sub>5</sub> , Cr <sub>7</sub> C <sub>3</sub>                   |             |
| Pt        | V         | W         | 46.1  | -8.7  | WPt <sub>2</sub> , W, V <sub>6</sub> C <sub>5</sub> , VPt <sub>2</sub>                                                               |             |
| Pt        | V         | Ta        | 54.2  | -0.6  | TaPt <sub>2</sub> , V <sub>2</sub> C, V <sub>6</sub> C <sub>5</sub> , Ta <sub>2</sub> C                                              |             |
| Si        | Ti        | Ta        | -0.2  | -55.1 | Ti <sub>3</sub> SiC <sub>2</sub> , TaSi <sub>2</sub> , Ta <sub>5</sub> Si <sub>3</sub> , Ta <sub>4</sub> C <sub>3</sub>              |             |

|    |    |    |       |       |                                                                                                                         |
|----|----|----|-------|-------|-------------------------------------------------------------------------------------------------------------------------|
| Si | V  | Ti | 11.4  | -43.5 | VSi <sub>2</sub> , Ti <sub>3</sub> SiC <sub>2</sub> , V <sub>6</sub> C <sub>5</sub> , V <sub>5</sub> Si <sub>3</sub>    |
| Si | Ta | Ti | 14.6  | -40.3 | TaSi <sub>2</sub> , Ti <sub>3</sub> SiC <sub>2</sub> , Ta <sub>4</sub> C <sub>3</sub> , TA <sub>5</sub> Si <sub>3</sub> |
| Si | Ti | V  | 20.4  | -34.5 | Ti <sub>3</sub> SiC <sub>2</sub> , VSi <sub>2</sub> , V <sub>5</sub> Si <sub>3</sub> , V <sub>6</sub> C <sub>5</sub>    |
| Si | Ta | Sc | 22.4  | -32.4 | TaC, TaSi <sub>2</sub> , Sc <sub>5</sub> Si <sub>3</sub> C <sub>0.5</sub> , Ta <sub>4</sub> C <sub>3</sub>              |
| Si | Sc | Ta | 32.2  | -22.7 | TaC, Sc <sub>5</sub> Si <sub>3</sub> C <sub>0.5</sub> , SiC                                                             |
| Si | V  | Ta | 41.0  | -13.8 | VSi <sub>2</sub> , Ta <sub>4</sub> C <sub>3</sub> , V <sub>6</sub> C <sub>5</sub> , V <sub>5</sub> Si <sub>3</sub>      |
| Si | Ti | W  | 52.7  | -2.1  | Ti <sub>4</sub> SiC <sub>3</sub> , WSi <sub>2</sub> , W                                                                 |
| Sn | Sc | Nb | -20.5 | -75.4 | ScSn <sub>2</sub> , Sc <sub>2</sub> SnC, Sc <sub>3</sub> SnC, Nb <sub>6</sub> C <sub>5</sub>                            |
| Sn | Zr | Sc | -16.1 | -70.9 | Zr <sub>2</sub> SnC, ZrC, ScSn <sub>2</sub> , Sc <sub>3</sub> SnC                                                       |
| Sn | Sc | Zr | -13.1 | -67.9 | ZrC, ScSn <sub>2</sub> , Sc <sub>3</sub> SnC                                                                            |
| Sn | Nb | Ti | -2.2  | -57.1 | Nb <sub>2</sub> SnC, Ti <sub>2</sub> SnC                                                                                |
| Sn | Nb | Sc | -2.1  | -56.9 | (Sc <sub>2/3</sub> Nb <sub>1/3</sub> ) <sub>2</sub> SnC, Nb <sub>2</sub> SnC                                            |
| Sn | Ti | Nb | -1.9  | -56.7 | Ti <sub>2</sub> SnC, Nb <sub>2</sub> SnC                                                                                |
| Sn | Zr | Hf | -0.2  | -55.1 | Zr <sub>2</sub> SnC, Hf <sub>2</sub> SnC                                                                                |
| Sn | Hf | Zr | -0.2  | -55.0 | Hf <sub>2</sub> SnC, Zr <sub>2</sub> SnC                                                                                |
| Sn | Sc | Ta | 0.0   | -54.9 | TaC, ScSn <sub>2</sub> , Sc <sub>3</sub> SnC                                                                            |
| Sn | Hf | Nb | 5.6   | -49.2 | Hf <sub>2</sub> SnC, Nb <sub>2</sub> SnC                                                                                |
| Sn | Nb | Hf | 6.5   | -48.4 | Nb <sub>2</sub> SnC, Hf <sub>2</sub> SnC                                                                                |
| Sn | Zr | Nb | 7.6   | -47.3 | Zr <sub>2</sub> SnC, Nb <sub>2</sub> SnC                                                                                |
| Sn | Nb | Zr | 8.4   | -46.5 | Nb <sub>2</sub> SnC, Zr <sub>2</sub> SnC                                                                                |
| Sn | Sc | Mo | 12.4  | -42.4 | Sc <sub>2</sub> MoSnC <sub>2</sub> , ScSn <sub>2</sub> , Mo, Sc <sub>3</sub> SnC                                        |
| Sn | Hf | Sc | 12.8  | -42.1 | HfC, Hf <sub>2</sub> SnC, Sc <sub>6</sub> Sn <sub>5</sub> , ScSn <sub>2</sub>                                           |
| Sn | Hf | Ti | 16.3  | -38.6 | Hf <sub>2</sub> SnC, Ti <sub>2</sub> SnC                                                                                |
| Sn | Ti | Hf | 17.3  | -37.6 | Ti <sub>2</sub> SnC, Hf <sub>2</sub> SnC                                                                                |
| Sn | Ti | V  | 19.1  | -35.7 | Ti <sub>2</sub> SnC, V <sub>2</sub> C, Sn                                                                               |
| Sn | Sc | Ti | 19.5  | -35.4 | Sc <sub>2</sub> SnC, Ti <sub>3</sub> SnC <sub>2</sub> , ScSn <sub>2</sub> , Sc <sub>3</sub> SnC                         |
| Sn | Ti | Ta | 19.6  | -35.3 | Ti <sub>2</sub> SnC, Ta <sub>2</sub> C, Sn                                                                              |
| Sn | V  | Ti | 19.9  | -34.9 | V <sub>2</sub> C, Sn, Ti <sub>2</sub> SnC                                                                               |
| Sn | Nb | V  | 24.2  | -30.6 | Nb <sub>2</sub> SnC, V <sub>2</sub> C, Sn                                                                               |
| Sn | Sc | Hf | 25.2  | -29.6 | HfC, ScSn <sub>2</sub> , Sc <sub>3</sub> SnC                                                                            |
| Sn | Zr | Ti | 28.6  | -26.2 | Zr <sub>2</sub> SnC, Ti <sub>2</sub> SnC                                                                                |
| Sn | Ti | Sc | 28.9  | -26.0 | Ti <sub>3</sub> SnC <sub>2</sub> , ScSn <sub>2</sub> , Sc <sub>3</sub> SnC, Sc <sub>6</sub> Sn <sub>5</sub>             |
| Sn | Ti | Zr | 30.1  | -24.8 | Ti <sub>2</sub> SnC, Zr <sub>2</sub> SnC                                                                                |
| Sn | V  | Nb | 31.0  | -23.8 | V <sub>2</sub> C, Sn, Nb <sub>2</sub> SnC                                                                               |
| Sn | Ti | Mo | 31.8  | -23.1 | Sn, Ti <sub>3</sub> SnC <sub>2</sub> , Mo, Mo <sub>2</sub> C                                                            |
| Sn | Nb | Ta | 32.5  | -22.3 | Nb <sub>2</sub> SnC, Ta <sub>2</sub> C, Sn                                                                              |
| Sn | Hf | Ta | 36.8  | -18.0 | Hf <sub>2</sub> SnC, Ta <sub>2</sub> C, Sn                                                                              |
| Sn | Zr | Ta | 38.4  | -16.5 | Zr <sub>2</sub> SnC, ZrSn <sub>2</sub> , Ta <sub>2</sub> C, Ta <sub>4</sub> C <sub>3</sub>                              |
| Sn | Zr | Mo | 53.4  | -1.5  | Zr <sub>2</sub> SnC, Mo <sub>2</sub> C, Sn                                                                              |
| Sn | V  | Ta | 54.7  | -0.1  | Sn, V <sub>2</sub> C, Ta <sub>2</sub> C                                                                                 |
| Sn | Ta | Ti | 54.8  | -0.1  | Ta <sub>2</sub> C, Sn, Ti <sub>2</sub> SnC                                                                              |
| Zn | V  | Ti | 15.4  | -39.4 | V <sub>2</sub> ZnC, Ti <sub>3</sub> Zn <sub>3</sub> C, TiC, V <sub>2</sub> C                                            |
| Zn | Mn | Fe | 15.5  | -39.4 | C, Fe, FeZn <sub>13</sub> , Mn <sub>23</sub> C <sub>6</sub>                                                             |
| Zn | Ti | V  | 25.4  | -29.4 | V <sub>2</sub> C, TiC, Ti <sub>3</sub> Zn <sub>3</sub> C                                                                |
| Zn | Ti | Nb | 29.3  | -25.5 | TiC <sub>0.875</sub> , Nb <sub>2</sub> C, Ti <sub>3</sub> Zn <sub>3</sub> C, NbZn <sub>3</sub>                          |
| Zn | Fe | Mn | 29.6  | -25.2 | FeZn <sub>13</sub> , Mn <sub>23</sub> C <sub>6</sub>                                                                    |
| Zn | Nb | Ti | 33.1  | -21.7 | Nb <sub>2</sub> C, TiC <sub>0.875</sub> , NbZn <sub>3</sub> , Ti <sub>3</sub> Zn <sub>3</sub> C                         |
| Zn | Mn | Cr | 33.9  | -21.0 | Zn, Cr <sub>3</sub> C <sub>2</sub> , C, Mn <sub>23</sub> C <sub>6</sub>                                                 |
| Zn | V  | Ta | 35.4  | -19.5 | V <sub>2</sub> ZnC, Ta <sub>2</sub> C, Zn                                                                               |
| Zn | Ti | Ta | 36.9  | -17.9 | TiC, Ti <sub>3</sub> Zn <sub>3</sub> C, Ta <sub>2</sub> C                                                               |
| Zn | Ti | Mo | 41.9  | -12.9 | TiC, Mo, Ti <sub>3</sub> Zn <sub>3</sub> C, MoZn <sub>6</sub>                                                           |
| Zn | Mn | Co | 43.8  | -11.0 | C, Co <sub>3</sub> ZnC, CoZn <sub>13</sub> , Mn <sub>23</sub> C <sub>6</sub>                                            |
| Zn | Ta | Ti | 44.4  | -10.5 | Ta <sub>2</sub> C, TiC, TiZn <sub>3</sub>                                                                               |
| Zn | V  | Cr | 47.5  | -7.4  | Zn, Cr, V <sub>2</sub> ZnC, V <sub>6</sub> C <sub>5</sub>                                                               |
| Zn | Nb | Ta | 51.6  | -3.2  | NbZn <sub>3</sub> , Ta <sub>2</sub> C, Nb <sub>2</sub> C, Nb <sub>6</sub> C <sub>5</sub>                                |
| Zn | Nb | V  | 52.5  | -2.3  | NbZn <sub>3</sub> , V <sub>2</sub> C, Nb <sub>2</sub> C, Nb <sub>6</sub> C <sub>5</sub>                                 |
| Zn | Cr | Mn | 53.3  | -1.5  | Cr <sub>3</sub> C <sub>2</sub> , Zn, MnZn <sub>3</sub> , Mn <sub>23</sub> C <sub>6</sub>                                |

**Supplementary Table 6.** Statistics of the known and predicted quaternary *i*-MAX phases and solid solution MAX phases, categorized by the calculated thermodynamic stability,  $\Delta H_{i\text{-MAX}}$  or  $\Delta G_{\text{solid solution}}$ , and energy difference between order and solid solution phases,  $\Delta H_{i\text{-MAX}} - \Delta G_{\text{solid solution}}$ , at 2000 K. Metastable phases are categorized by their formation enthalpy above the convex hull. Units is in meV/atom.

| Quaternary<br>( $M'_{2/3}M''_{1/3}$ ) <sub>2</sub> AC phases | Stability criteria                                              |                                                              | Previously known | Newly Predicted |
|--------------------------------------------------------------|-----------------------------------------------------------------|--------------------------------------------------------------|------------------|-----------------|
|                                                              | $\Delta H_{i\text{-MAX}}$ OR $\Delta G_{\text{solid solution}}$ | $\Delta H_{i\text{-MAX}} - \Delta G_{\text{solid solution}}$ |                  |                 |
| Stable <i>i</i> -MAX                                         | $\Delta H_{i\text{-MAX}} < 0$                                   | $< 0$                                                        | 13               | 79              |
| Nonstable or metastable <i>i</i> -MAX                        | $0 \leq \Delta H_{i\text{-MAX}} \leq +60$ meV/atom              | $< 0$                                                        | 0                | 163             |
| Stable solid solution MAX                                    | $\Delta G_{\text{solid solution}} < 0$                          | $> 0$                                                        | 34               | 257             |
| Nonstable or metastable solid solution MAX                   | $0 \leq \Delta G_{\text{solid solution}} \leq +60$ meV/atom     | $> 0$                                                        | 1                | 255             |

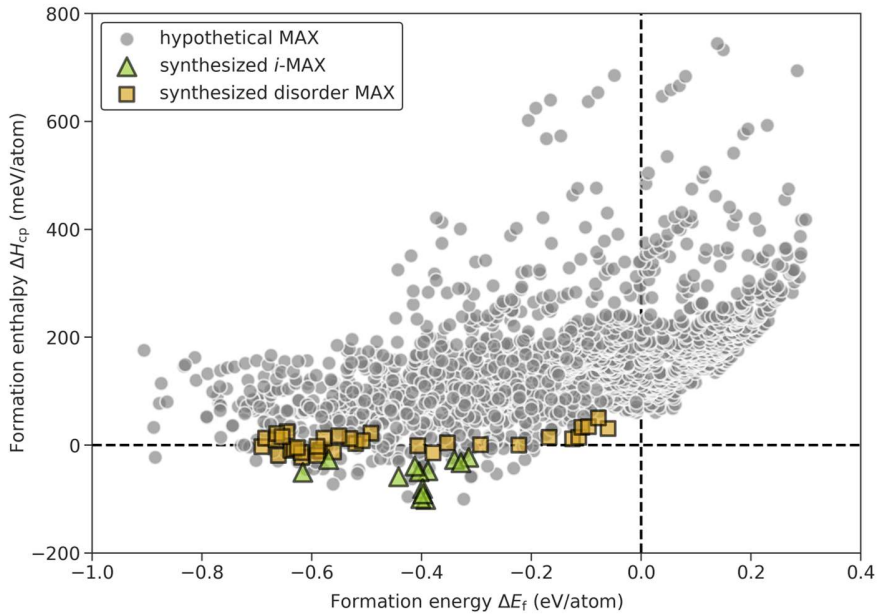

**Supplementary Fig. 3.** Calculated formation enthalpy as function of formation energy for ( $M'_{2/3}M''_{1/3}$ )<sub>2</sub>AC phases. Experimentally reported *i*-MAX phases are represented by green triangles and MAX with disorder by orange squares.

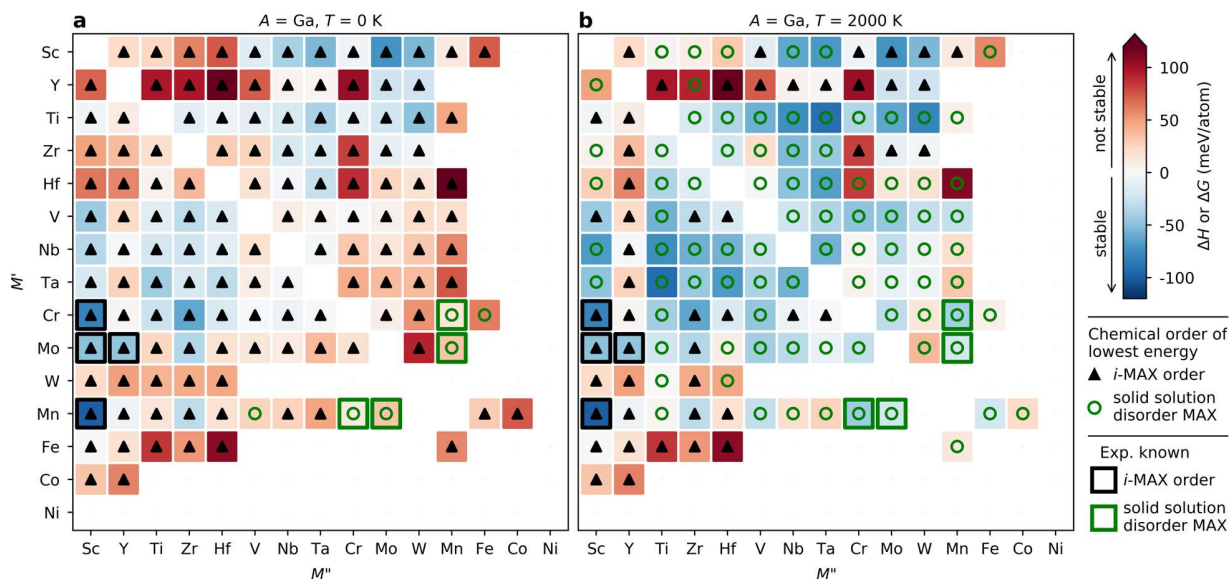

**Supplementary Fig. 4.** Calculated formation enthalpy  $\Delta H$  and Gibbs free energy of formation  $\Delta G$  at (a) 0 K and (b) 2000 K for  $(M'_{2/3}M''_{1/3})_2\text{GaC}$ . Symbols represent chemical order of lowest energy at given  $M'$  and  $M''$  with  $i$ -MAX represented by black triangles or solid solution MAX by green circles. Experimentally reported phases are marked by green ( $i$ -MAX) or black (solid solution MAX) squares.

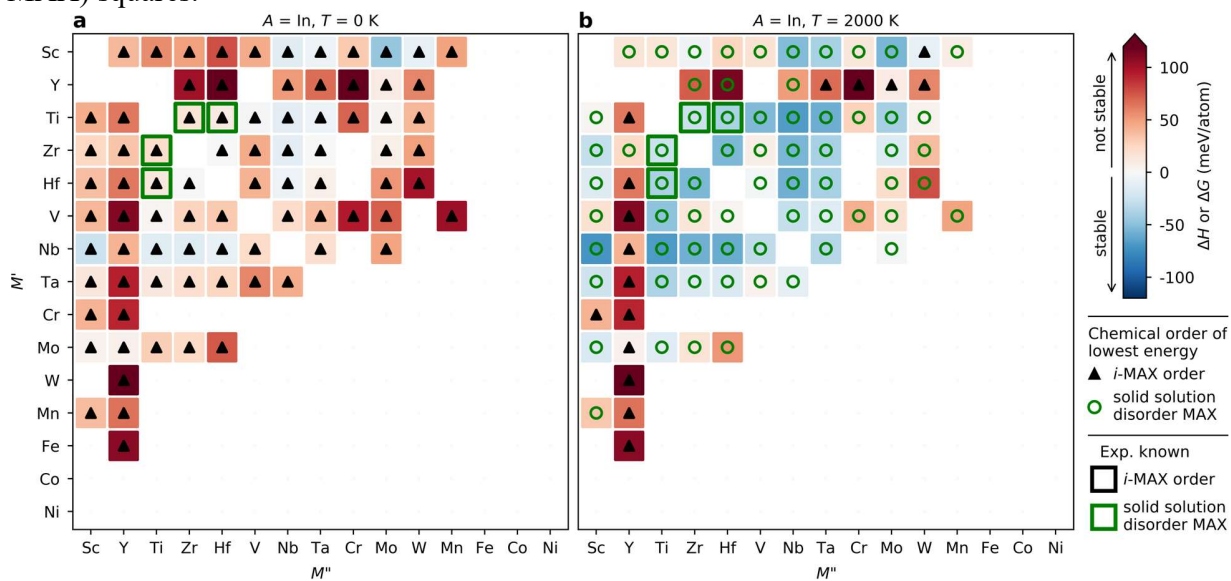

**Supplementary Fig. 5.** Calculated formation enthalpy  $\Delta H$  and Gibbs free energy of formation  $\Delta G$  at (a) 0 K and (b) 2000 K for  $(M'_{2/3}M''_{1/3})_2\text{InC}$ . Symbols represent chemical order of lowest energy at given  $M'$  and  $M''$  with  $i$ -MAX represented by black triangles or solid solution MAX by green circles. Experimentally reported phases are marked by green ( $i$ -MAX) or black (solid solution MAX) squares.

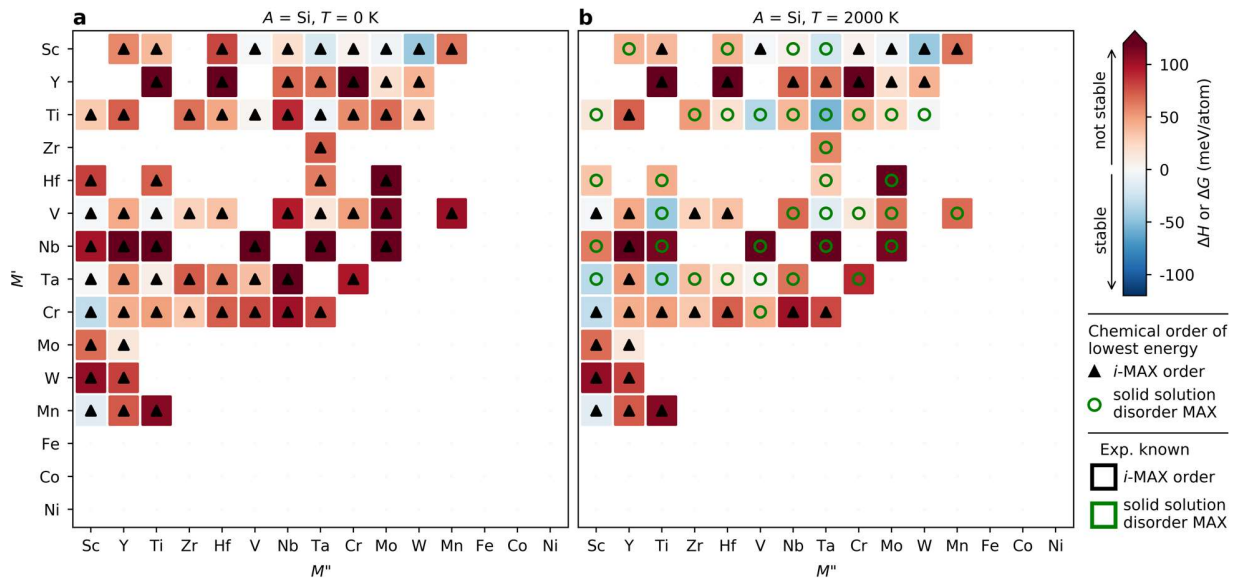

**Supplementary Fig. 6.** Calculated formation enthalpy  $\Delta H$  and Gibbs free energy of formation  $\Delta G$  at (a) 0 K and (b) 2000 K for  $(M'_{2/3}M''_{1/3})_2\text{SiC}$ . Symbols represent chemical order of lowest energy at given  $M'$  and  $M''$  with  $i$ -MAX represented by black triangles or solid solution MAX by green circles. Experimentally reported phases are marked by green ( $i$ -MAX) or black (solid solution MAX) squares.

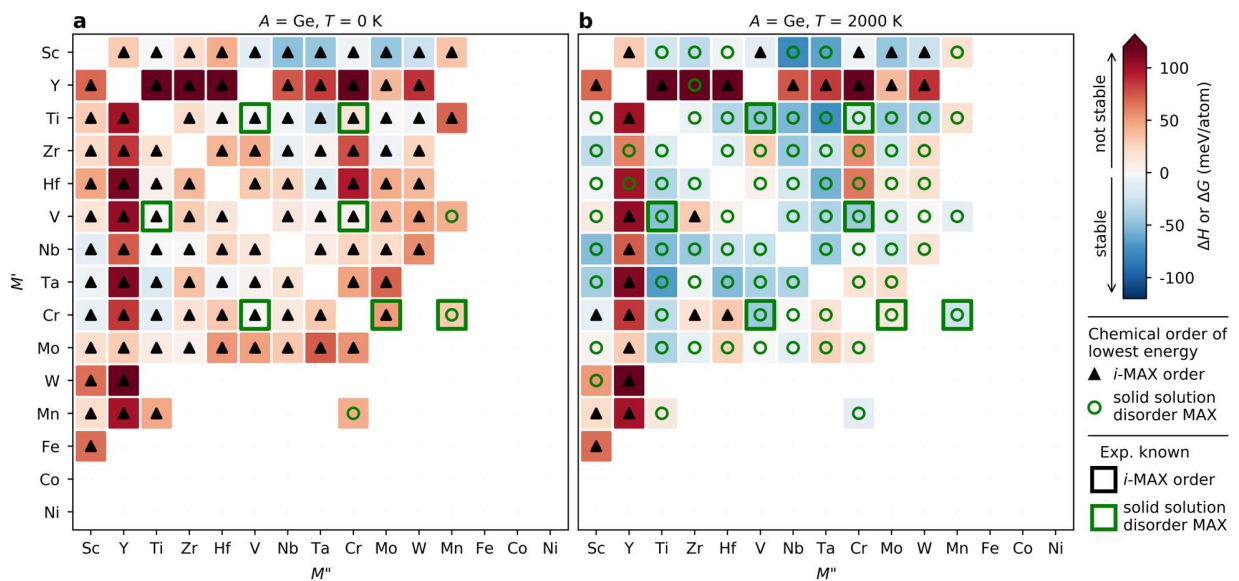

**Supplementary Fig. 7.** Calculated formation enthalpy  $\Delta H$  and Gibbs free energy of formation  $\Delta G$  at (a) 0 K and (b) 2000 K for  $(M'_{2/3}M''_{1/3})_2\text{GeC}$ . Symbols represent chemical order of lowest energy at given  $M'$  and  $M''$  with  $i$ -MAX represented by black triangles or solid solution MAX by green circles. Experimentally reported phases are marked by green ( $i$ -MAX) or black (solid solution MAX) squares.

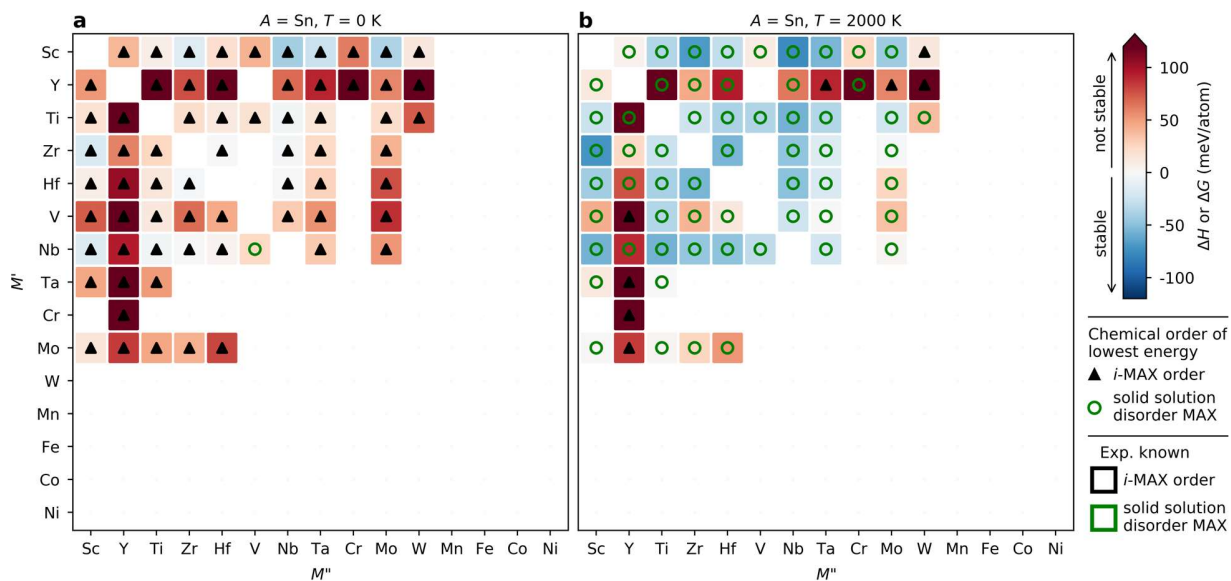

**Supplementary Fig. 8.** Calculated formation enthalpy  $\Delta H$  and Gibbs free energy of formation  $\Delta G$  at (a) 0 K and (b) 2000 K for  $(M'_{2/3}M''_{1/3})\text{SnC}$ . Symbols represent chemical order of lowest energy at given  $M'$  and  $M''$  with  $i$ -MAX represented by black triangles or solid solution MAX by green circles. Experimentally reported phases are marked by green ( $i$ -MAX) or black (solid solution MAX) squares.

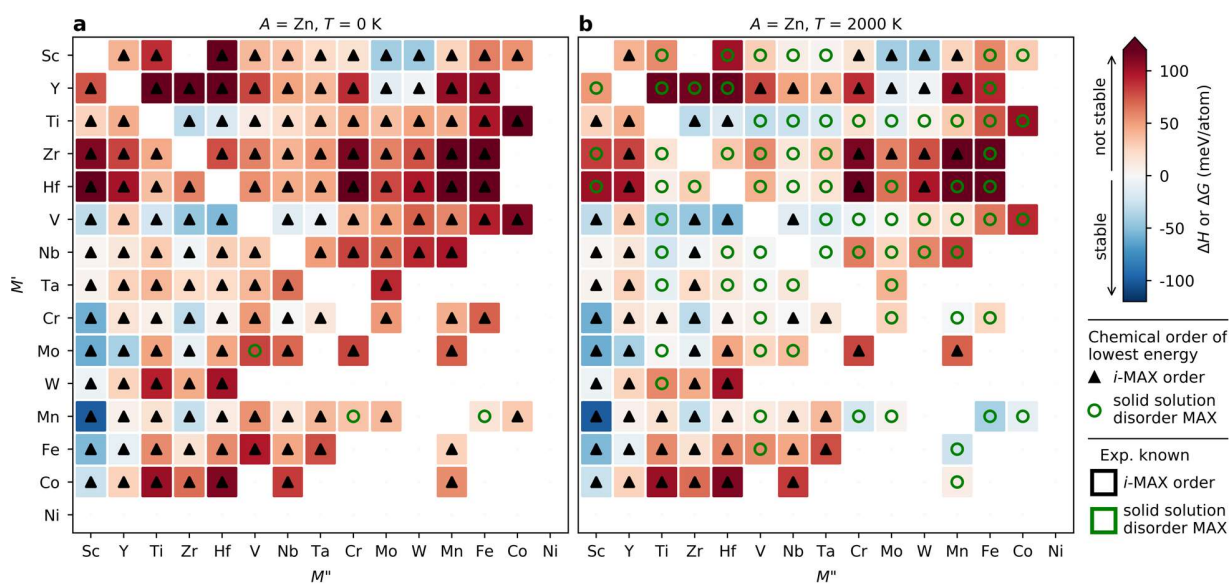

**Supplementary Fig. 9.** Calculated formation enthalpy  $\Delta H$  and Gibbs free energy of formation  $\Delta G$  at (a) 0 K and (b) 2000 K for  $(M'_{2/3}M''_{1/3})\text{ZnC}$ . Symbols represent chemical order of lowest energy at given  $M'$  and  $M''$  with  $i$ -MAX represented by black triangles or solid solution MAX by green circles. Experimentally reported phases are marked by green ( $i$ -MAX) or black (solid solution MAX) squares.

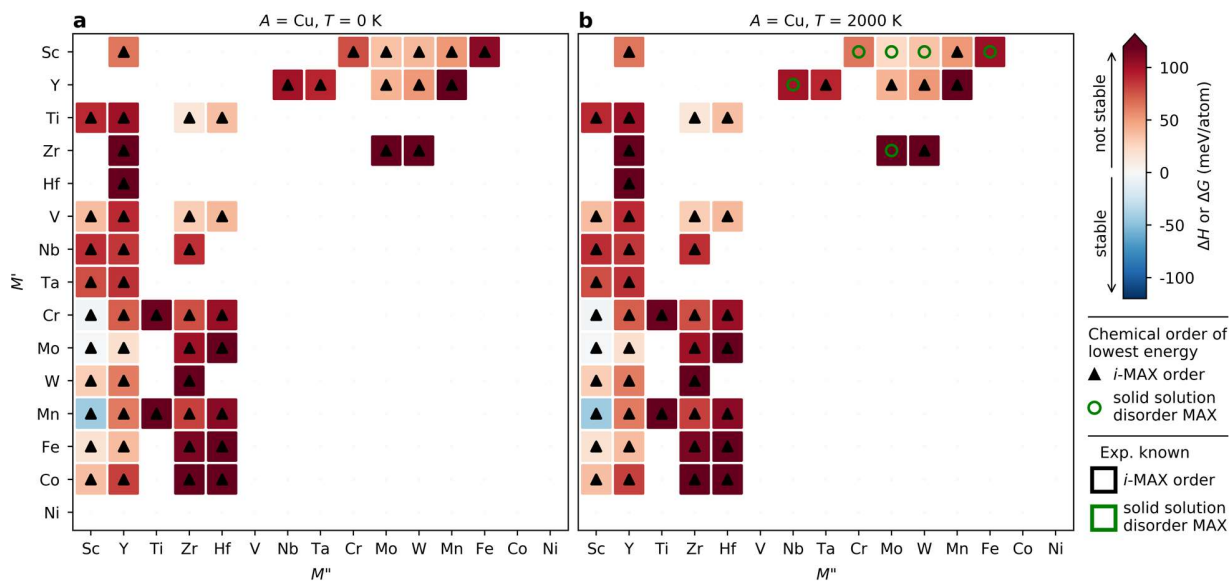

**Supplementary Fig. 10.** Calculated formation enthalpy  $\Delta H$  and Gibbs free energy of formation  $\Delta G$  at (a) 0 K and (b) 2000 K for  $(M'_{2/3}M''_{1/3})_2CuC$ . Symbols represent chemical order of lowest energy at given  $M'$  and  $M''$  with  $i$ -MAX represented by black triangles or solid solution MAX by green circles. Experimentally reported phases are marked by green ( $i$ -MAX) or black (solid solution MAX) squares.

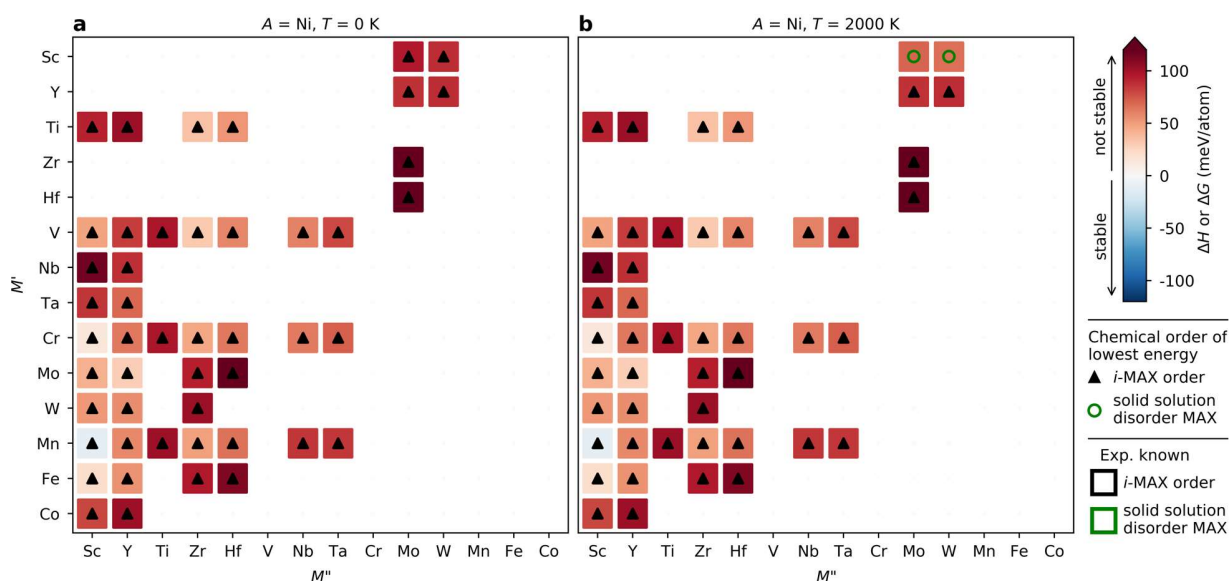

**Supplementary Fig. 11.** Calculated formation enthalpy  $\Delta H$  and Gibbs free energy of formation  $\Delta G$  at (a) 0 K and (b) 2000 K for  $(M'_{2/3}M''_{1/3})_2NiC$ . Symbols represent chemical order of lowest energy at given  $M'$  and  $M''$  with  $i$ -MAX represented by black triangles or solid solution MAX by green circles. Experimentally reported phases are marked by green ( $i$ -MAX) or black (solid solution MAX) squares.

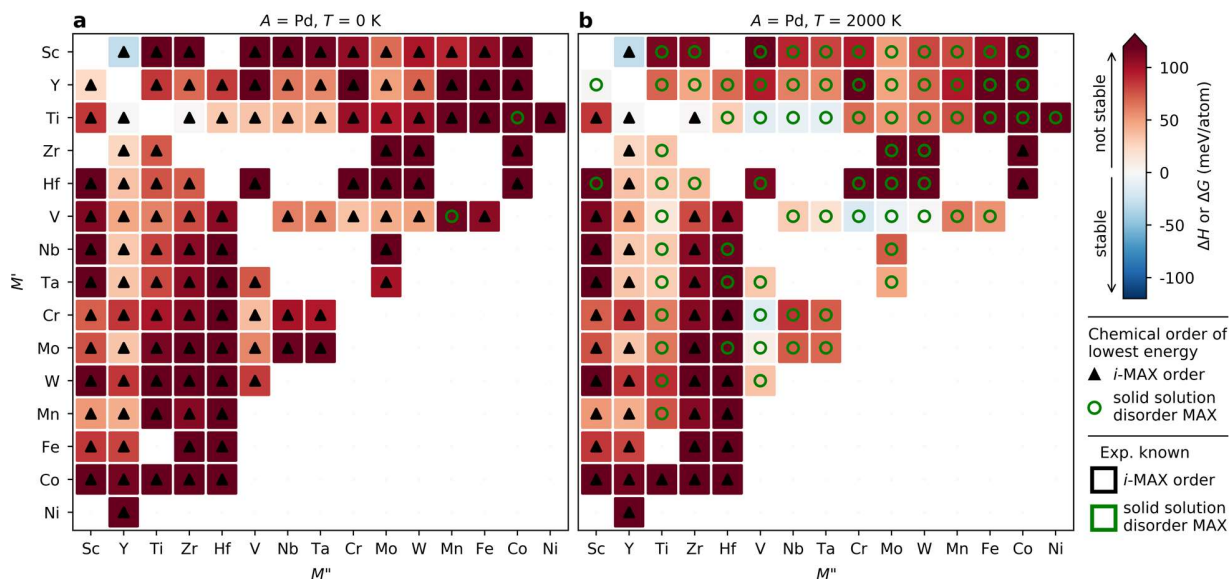

**Supplementary Fig. 12.** Calculated formation enthalpy  $\Delta H$  and Gibbs free energy of formation  $\Delta G$  at (a) 0 K and (b) 2000 K for  $(M'_{2/3}M''_{1/3})_2\text{PdC}$ . Symbols represent chemical order of lowest energy at given  $M'$  and  $M''$  with  $i$ -MAX represented by black triangles or solid solution MAX by green circles. Experimentally reported phases are marked by green ( $i$ -MAX) or black (solid solution MAX) squares.

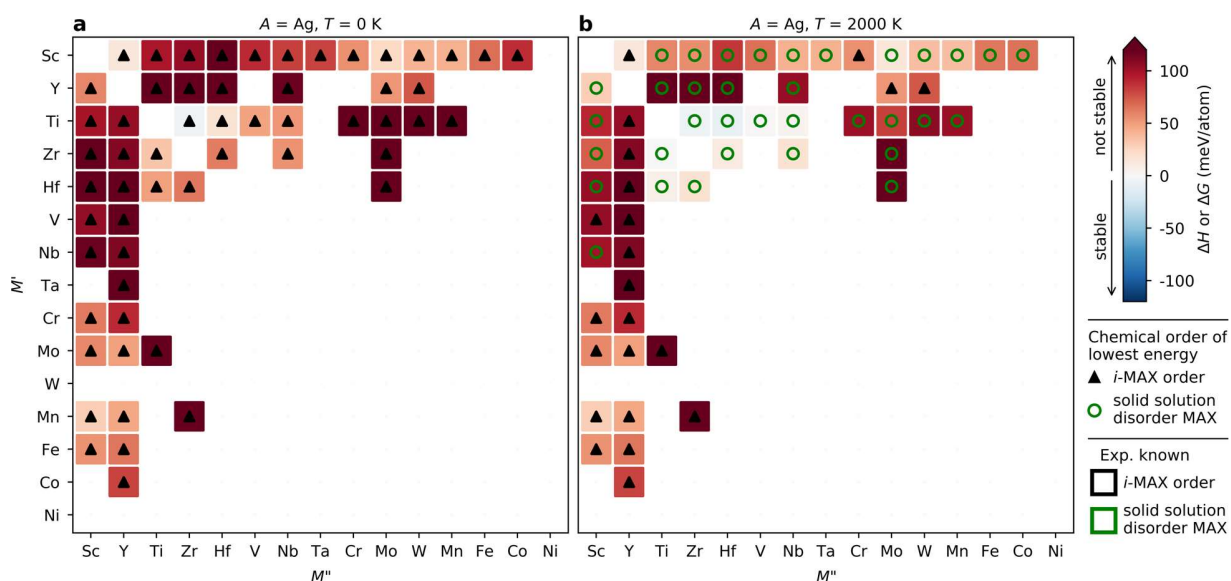

**Supplementary Fig. 13.** Calculated formation enthalpy  $\Delta H$  and Gibbs free energy of formation  $\Delta G$  at (a) 0 K and (b) 2000 K for  $(M'_{2/3}M''_{1/3})_2\text{AgC}$ . Symbols represent chemical order of lowest energy at given  $M'$  and  $M''$  with  $i$ -MAX represented by black triangles or solid solution MAX by green circles. Experimentally reported phases are marked by green ( $i$ -MAX) or black (solid solution MAX) squares.



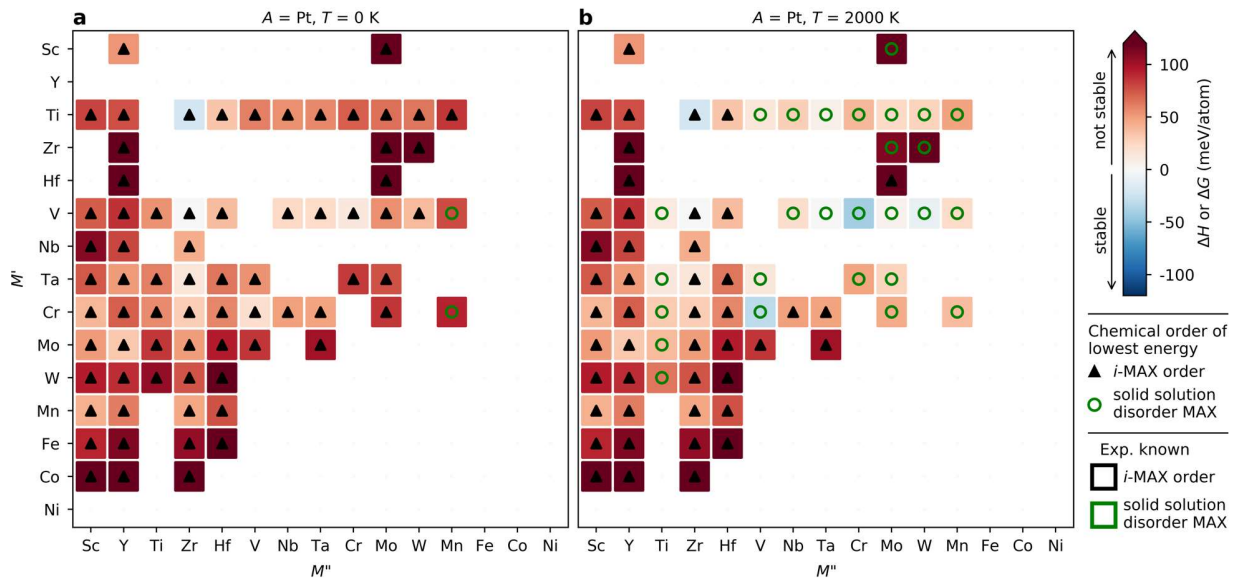

**Supplementary Fig. 14.** Calculated formation enthalpy  $\Delta H$  and Gibbs free energy of formation  $\Delta G$  at (a) 0 K and (b) 2000 K for  $(M'_{2/3}M''_{1/3})_2PtC$ . Symbols represent chemical order of lowest energy at given  $M'$  and  $M''$  with  $i$ -MAX represented by black triangles or solid solution MAX by green circles. Experimentally reported phases are marked by green ( $i$ -MAX) or black (solid solution MAX) squares.

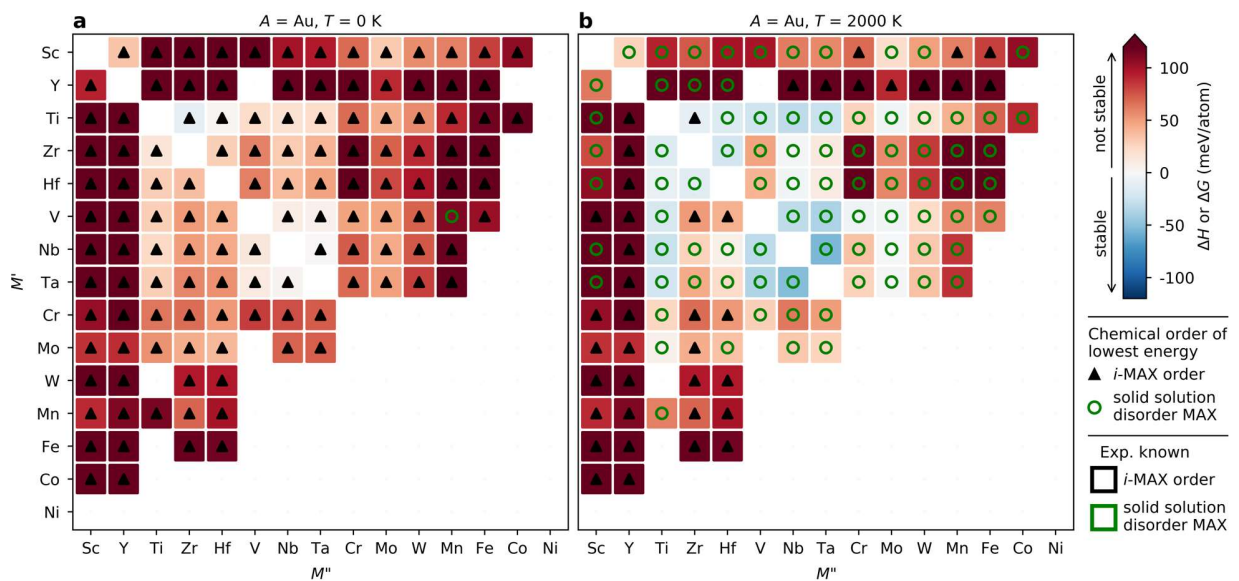

**Supplementary Fig. 15.** Calculated formation enthalpy  $\Delta H$  and Gibbs free energy of formation  $\Delta G$  at (a) 0 K and (b) 2000 K for  $(M'_{2/3}M''_{1/3})_2AuC$ . Symbols represent chemical order of lowest energy at given  $M'$  and  $M''$  with  $i$ -MAX represented by black triangles or solid solution MAX by green circles. Experimentally reported phases are marked by green ( $i$ -MAX) or black (solid solution MAX) squares.

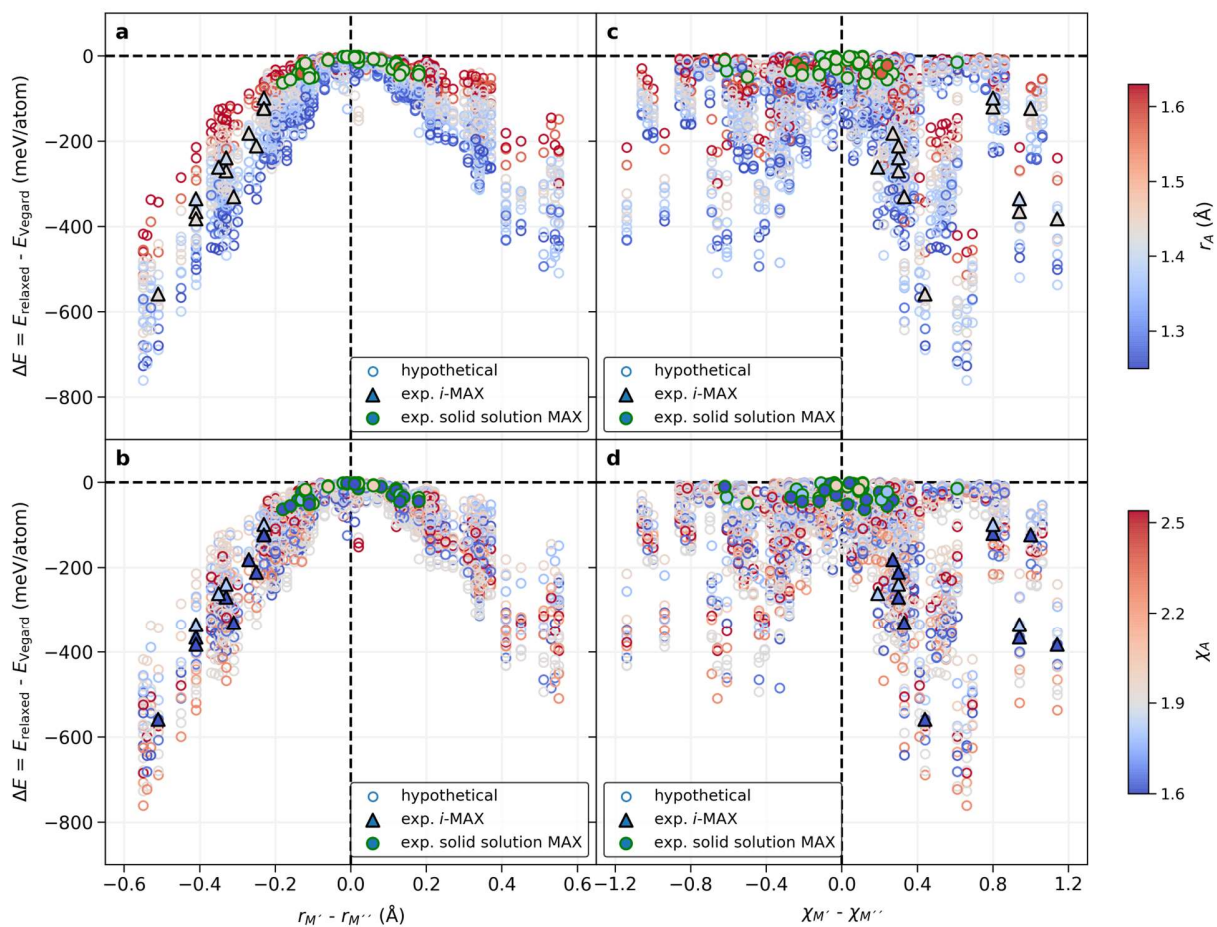

**Supplementary Fig. 16.** Calculated energy difference between relaxed *i*-MAX and MAX phase generated by Vegard's law structure as function of **a,b** atomic size difference of  $M'$  and  $M''$  and **c,d** electronegativity difference of  $M'$  and  $M''$ . Experimentally known *i*-MAX phases are indicated by black triangles and solid solution MAX phases by green circles. The coloring represents the atomic radius (a,c) or electronegativity (b,d) of the *A* element.

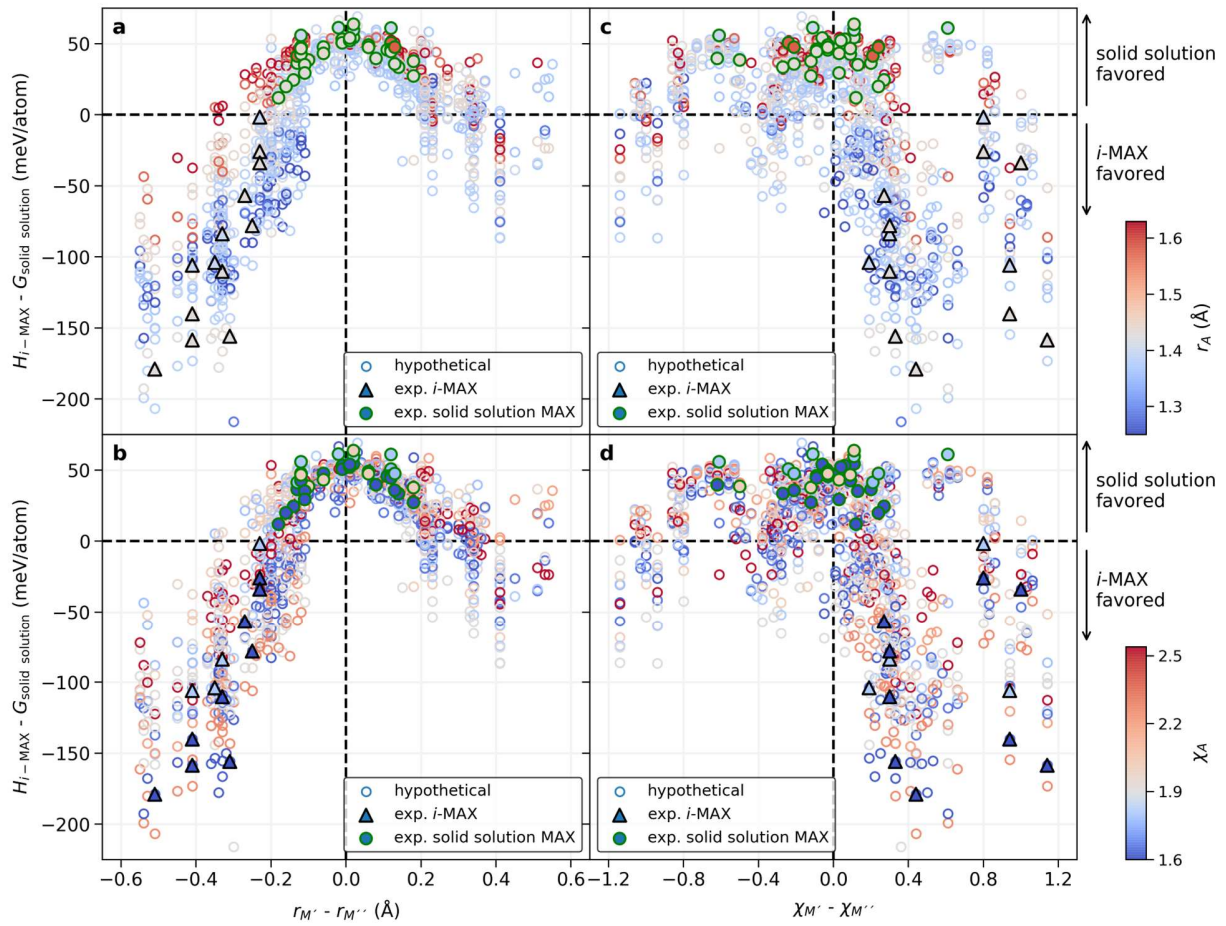

**Supplementary Fig. 17.** Energy difference between *i*-MAX and solid solution MAX at 2000 K as function of **a,b** atomic size difference of  $M'$  and  $M''$  and **c,d** electronegativity difference of  $M'$  and  $M''$ . Experimentally known *i*-MAX phases are indicated by black triangles and solid solution MAX phases by green circles. The coloring represents the atomic radius (a,c) or electronegativity (b,d) of the  $A$  element.

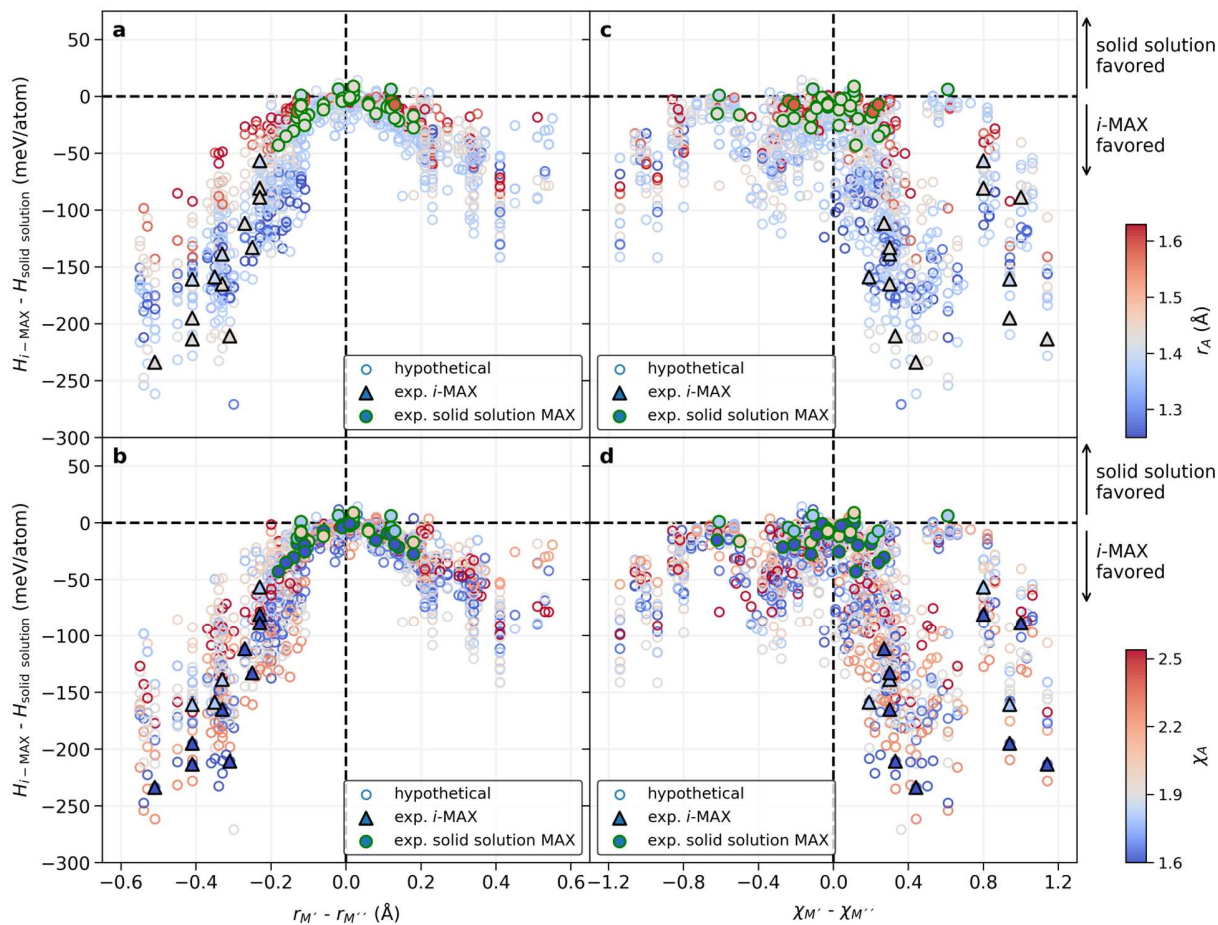

**Supplementary Fig. 18.** Energy difference between *i*-MAX and solid solution MAX at 0 K as function of **a,b** atomic size difference of  $M'$  and  $M''$  and **c,d** electronegativity difference of  $M'$  and  $M''$ . Experimentally known *i*-MAX phases are indicated by black triangles and solid solution MAX phases by green circles. The coloring represents the atomic radius (a,c) or electronegativity (b,d) of the  $A$  element.

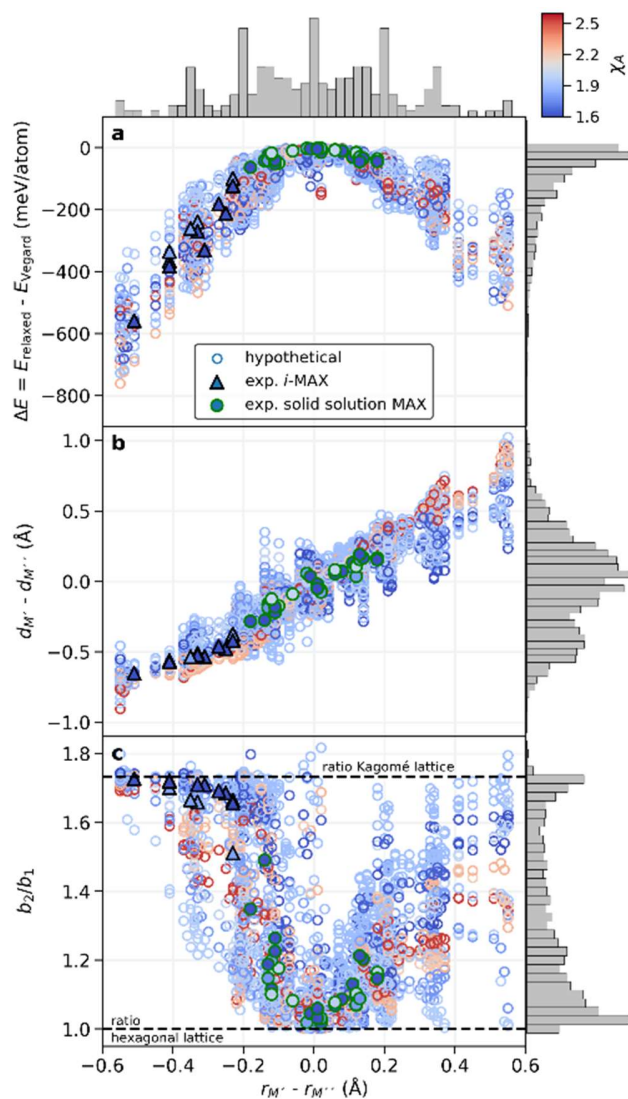

**Supplementary Fig. 19.** Calculated energy difference between relaxed *i*-MAX and MAX phase generated by Vegard's law structure, **b** interlayer distance between  $M'$  and  $M''$  for relaxed *i*-MAX, and **c** ratio of next-nearest and nearest *A*-*A* distance within the *A*-layer, as function of atomic size difference of  $M'$  and  $M''$  for  $(M'_{2/3}M''_{1/3})_2AC$ . Experimentally known *i*-MAX phases are indicated by black triangles and solid solution MAX phases by green circles. The coloring represents the electronegativity of the *A* element. Histograms are given for each axis.

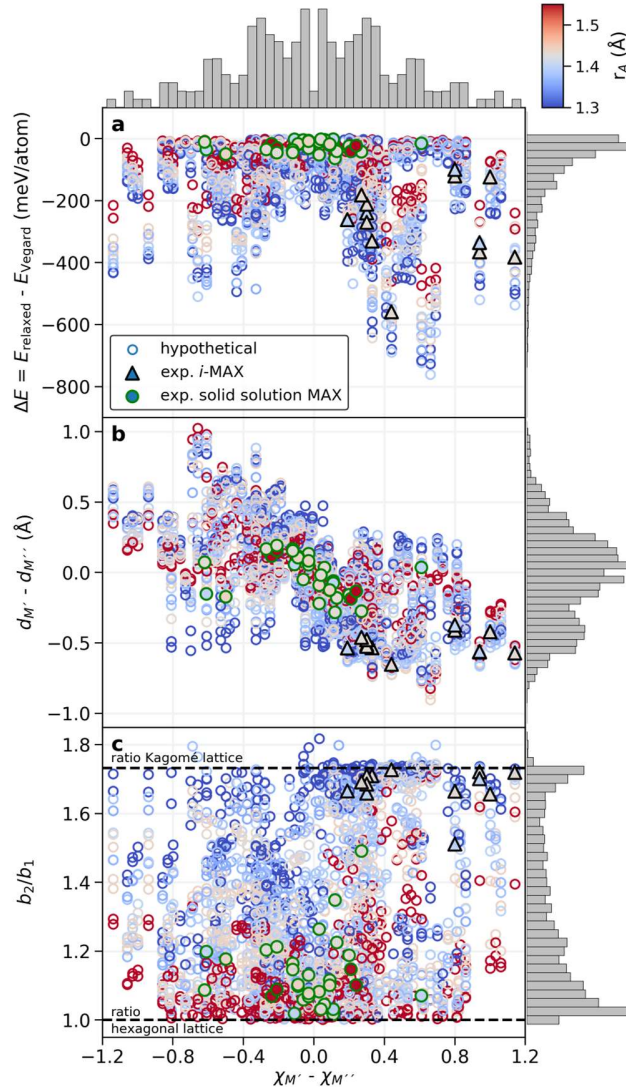

**Supplementary Fig. 20.** Calculated energy difference between relaxed *i*-MAX and MAX phase generated by Vegard's law structure, **b** interlayer distance between  $M'$  and  $M''$  for relaxed *i*-MAX, and **c** ratio of next-nearest and nearest  $A$ - $A$  distance within the  $A$ -layer, as function of electronegativity difference of  $M'$  and  $M''$  for  $(M'_{2/3}M''_{1/3})_2AC$ . Experimentally known *i*-MAX phases are indicated by black triangles and solid solution MAX phases by green circles. The coloring represents the atomic radius of the  $A$  element. Histograms are given for each axis.

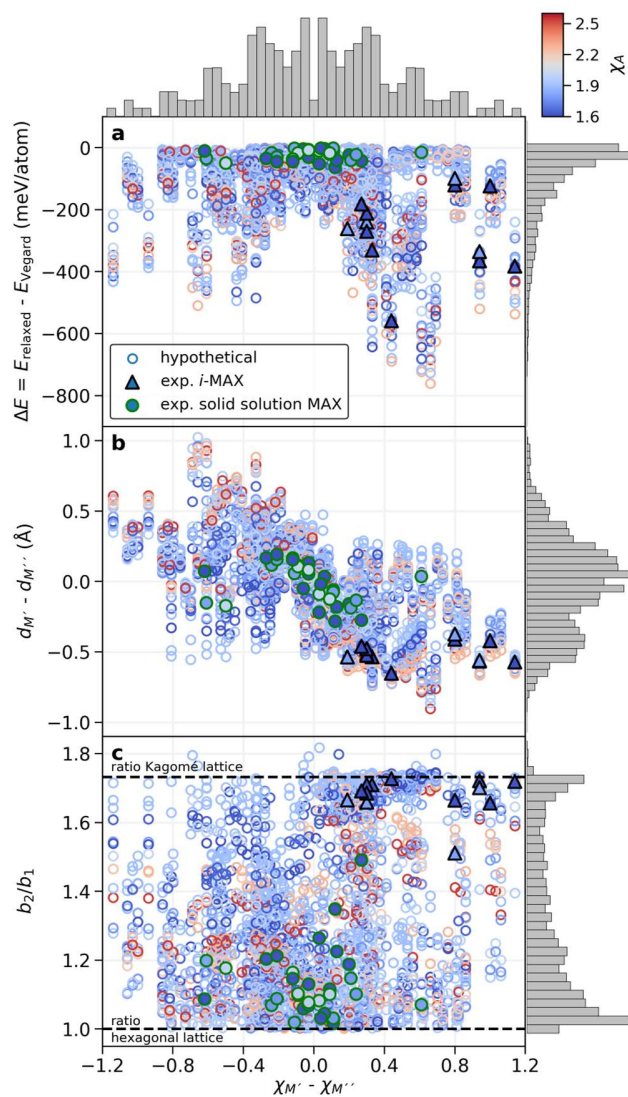

**Supplementary Fig. 21.** Calculated energy difference between relaxed *i*-MAX and MAX phase generated by Vegard's law structure, **b** interlayer distance between  $M'$  and  $M''$  for relaxed *i*-MAX, and **c** ratio of next-nearest and nearest *A*-*A* distance within the *A*-layer, as function of electronegativity difference of  $M'$  and  $M''$  for  $(M'_{2/3}M''_{1/3})_2AC$ . Experimentally known *i*-MAX phases are indicated by black triangles and solid solution MAX phases by green circles. The coloring represents the electronegativity of the *A* element. Histograms are given for each axis.

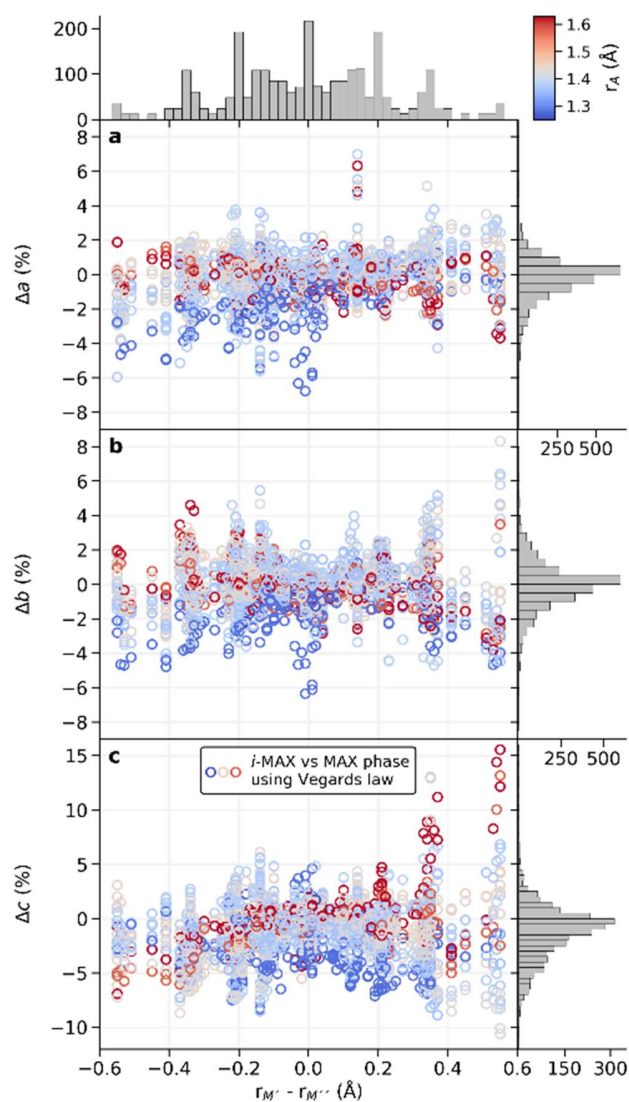

**Supplementary Fig. 22.** Deviation in lattice parameters  $a$ ,  $b$  and  $c$  between the relaxed  $i$ -MAX structure and the MAX phase structure generated by using Vegard's law as function of atomic size difference of  $M'$  and  $M''$  for  $(M'_{2/3}M''_{1/3})_2AC$ . The coloring represents the atomic radius of the  $A$  element. Histograms are given for each axis.



**Supplementary Table 7.** PBE potentials for considered elements in this work.

| Element | PBE potential | Valence states |
|---------|---------------|----------------|
| Sc      | Sc_sv         | 3s3p4s3d       |
| Y       | Y_sv          | 4s4p5s4d       |
| Ti      | Ti            | 4s3d           |
| Zr      | Zr_sv         | 4s4p5s4d       |
| Hf      | Hf_pv         | 5p6s5d         |
| V       | V_sv          | 3s3p4s3d       |
| Nb      | Nb_pv         | 4p5s4d         |
| Ta      | Ta            | 6s5d           |
| Cr      | Cr_pv         | 3p4s3d         |
| Mo      | Mo_pv         | 4p5s4d         |
| W       | W             | 6s5d           |
| Mn      | Mn_pv         | 3p4s3d         |
| Fe      | Fe_pv         | 3p4s3d         |
| Co      | Co            | 4s3d           |
| Ni      | Ni            | 4s3d           |
| Al      | Al            | 3s3p           |
| Ga      | Ga_d          | 4s4p3d         |
| In      | In_d          | 5s5p4d         |
| Si      | Si            | 3s3p           |
| Ge      | Ge_d          | 4s4p3d         |
| Sn      | Sn_d          | 5s5p4d         |
| Cu      | Cu            | 4p3d           |
| Zn      | Zn            | 4p3d           |
| Pd      | Pd_pv         | 4p5s4d         |
| Ag      | Ag            | 5s4d           |
| Pt      | Pt_pv         | 5p6s5d         |
| Au      | Au            | 6s5d           |
| C       | C             | 2s2p           |

## REFERENCES

1. Schuster J. C., Nowotny H., Vaccaro C. The ternary systems: CrAlC, VAlC, and TiAlC and the behavior of H-phases ( $M_2AlC$ ). *J Solid State Chem* **32**, 213-219 (1980).
2. Yeh C. L., Yang W. J. Formation of MAX solid solutions  $(Ti,V)_2AlC$  and  $(Cr,V)_2AlC$  with  $Al_2O_3$  addition by SHS involving aluminothermic reduction. *Ceram Int* **39**, 7537-7544 (2013).
3. Yeh C.-L., Yang W.-J. Effects of Ti and  $TiO_2$  on Combustion Synthesis of  $(Ti,V)_2AlC/Al_2O_3$  Solid Solution Composites. *Materials and Manufacturing Processes* **30**, 292-297 (2015).
4. Han M., Maleski K., Shuck C. E., Yang Y., Glazar J. T., Foucher A. C., *et al.* Tailoring Electronic and Optical Properties of MXenes through Forming Solid Solutions. *J Am Chem Soc* **142**, 19110-19118 (2020).
5. Tian W., Sun Z., Hashimoto H., Du Y. Synthesis, microstructure and properties of  $(Cr_{1-x}V_x)_2AlC$  solid solutions. *J Alloys Compd* **484**, 130-133 (2009).
6. Caspi E. N., Chartier P., Porcher F., Damay F., Cabioch T. Ordering of (Cr,V) layers in nanolamellar  $(Cr_{0.5}V_{0.5})_{n+1}AlC_n$  compounds. *Mater Res Lett* **3**, 100-106 (2015).
7. Halim J., Chartier P., Basyuk T., Prikhna T., Caspi E. a. N., Barsoum M. W., *et al.* Structure and thermal expansion of  $(Cr_x,V_{1-x})_{n+1}AlC_n$  phases measured by X-ray diffraction. *J Eur Ceram Soc* **37**, 15-21 (2017).
8. Horlait D., Grasso S., Al Nasiri N., Burr P. A., Lee W. E. Synthesis and Oxidation Testing of MAX Phase Composites in the Cr–Ti–Al–C Quaternary System. *J Am Ceram Soc* **99**, 682-690 (2016).
9. Scabarozzi T. H., Gennaoui C., Roche J., Flemming T., Wittenberger K., Hann P., *et al.* Combinatorial investigation of  $(Ti_{1-x}Nb_x)_2AlC$ . *Appl Phys Lett* **95**, 101907 (2009).
10. Yeh C. L., Chen J. H. Combustion synthesis of  $(Ti_{1-x}Nb_x)_2AlC$  solid solutions from elemental and  $Nb_2O_5/Al_4C_3$ -containing powder compacts. *Ceram Int* **37**, 3089-3094 (2011).
11. Salama I., El-Raghy T., Barsoum M. W. Synthesis and mechanical properties of  $Nb_2AlC$  and  $(Ti,Nb)_2AlC$ . *J Alloys Compd* **347**, 271-278 (2002).
12. Nowotny H., Rogl P., Schuster J. C. Structural chemistry of complex carbides and related compounds. *J Solid State Chem* **44**, 126-133 (1982).
13. Griseri M., Tunca B., Huang S., Dahlqvist M., Rosén J., Lu J., *et al.* Ta-based 413 and 211 MAX phase solid solutions with Hf and Nb. *J Eur Ceram Soc* **40**, 1829-1838 (2020).
14. Sridharan S., Nowotny H. Studies in the ternary system Ti-Ta-Al and in the quaternary system Ti-Ta-Al-C. *Z Metallkd* **74**, 468-472 (1983).
15. Tunca B., Lapauw T., Karakulina O. M., Batuk M., Cabioch T., Hadermann J., *et al.* Synthesis of MAX Phases in the Zr-Ti-Al-C System. *Inorg Chem* **56**, 3489-3498 (2017).
16. Zapata-Solvas E., Hadi M. A., Horlait D., Parfitt D. C., Thibaud A., Chroneos A., *et al.* Synthesis and physical properties of  $(Zr_{1-x},Ti_x)_3AlC_2$  MAX phases. *J Am Ceram Soc* **100**, 3393-3401 (2017).
17. Naguib M., Bentzel G. W., Shah J., Halim J., Caspi E. N., Lu J., *et al.* New Solid Solution MAX Phases:  $(Ti_{0.5},V_{0.5})_3AlC_2$ ,  $(Nb_{0.5},V_{0.5})_2AlC$ ,  $(Nb_{0.5},V_{0.5})_4AlC_3$  and  $(Nb_{0.8},Zr_{0.2})_2AlC$ . *Mater Res Lett* **2**, 233-240 (2014).

18. Schuster J. C., Nowotny H. INVESTIGATIONS OF THE TERNARY SYSTEMS (Zr, Hf, Nb, Ta)-Al-C AND STUDIES ON COMPLEX CARBIDES. *Z Metallkd* **71**, 341-346 (1980).
19. Mockute A., Dahlqvist M., Emmerlich J., Hultman L., Schneider J. M., Persson P. O. Å., *et al.* Synthesis and *ab initio* calculations of nanolaminated (Cr,Mn)<sub>2</sub>AlC compounds. *Phys Rev B* **87**, 094113 (2013).
20. Mockute A., Lu J., Moon E. J., Yan M., Anasori B., May S. J., *et al.* Solid solubility and magnetism upon Mn incorporation in the bulk ternary carbides Cr<sub>2</sub>AlC and Cr<sub>2</sub>GaC. *Mater Res Lett* **3**, 16-22 (2014).
21. Hamm C. M., Bocarsly J. D., Seward G., Kramm U. I., Birkel C. S. Non-conventional synthesis and magnetic properties of MAX phases (Cr/Mn)<sub>2</sub>AlC and (Cr/Fe)<sub>2</sub>AlC. *J Mater Chem C* **5**, 5700-5708 (2017).
22. Reiffenstein E., Nowotny H., Benesovsky F. Strukturechemische und magnetochemische Untersuchungen an Komplexcarbiden. *Monatsh Chem* **97**, 1428-1436 (1966).
23. Lapauw T., Tunca B., Potashnikov D., Pesach A., Ozeri O., Vleugels J., *et al.* The double solid solution (Zr, Nb)<sub>2</sub>(Al, Sn)C MAX phase: a steric stability approach. *Sci Rep* **8**, 12801 (2018).
24. Halim J., Palisaitis J., Lu J., Thörnberg J., Moon E. J., Precner M., *et al.* Synthesis of Two-Dimensional Nb<sub>1.33</sub>C (MXene) with Randomly Distributed Vacancies by Etching of the Quaternary Solid Solution (Nb<sub>2/3</sub>Sc<sub>1/3</sub>)<sub>2</sub>AlC MAX Phase. *ACS Applied Nano Materials* **1**, 2455-2460 (2018).
25. Pan R., Zhu J., Liu Y. Synthesis, microstructure and properties of (Ti<sub>1-x</sub>,Mo<sub>x</sub>)<sub>2</sub>AlC phases. *Materials Science and Technology* **34**, 1064-1069 (2018).
26. Hamm C. M., Duerrschnabel M., Molina L., Salikhov R., Spoddig D., Farle M., *et al.* Structural, magnetic and electrical transport properties of non-conventionally prepared MAX phases V<sub>2</sub>AlC and (V/Mn)<sub>2</sub>AlC. *Materials Chemistry Frontiers* **2**, 483-490 (2017).
27. Lin S., Tong P., Wang B. S., Huang Y. N., Lu W. J., Shao D. F., *et al.* Magnetic and electrical/thermal transport properties of Mn-doped M<sub>n+1</sub>AX<sub>n</sub> phase compounds Cr<sub>2-x</sub>Mn<sub>x</sub>GaC (0 ≤ x ≤ 1). *J Appl Phys* **113**, 053502 (2013).
28. Petruhins A., Ingason A. S., Lu J., Magnus F., Olafsson S., Rosen J. Synthesis and characterization of magnetic (Cr<sub>0.5</sub>Mn<sub>0.5</sub>)<sub>2</sub>GaC thin films. *J Mater Sci* **50**, 4495-4502 (2015).
29. Lai C.-C., Tao Q., Fashandi H., Wiedwald U., Salikhov R., Farle M., *et al.* Magnetic properties and structural characterization of layered (Cr<sub>0.5</sub>Mn<sub>0.5</sub>)<sub>2</sub>AuC synthesized by thermally induced substitutional reaction in (Cr<sub>0.5</sub>Mn<sub>0.5</sub>)<sub>2</sub>GaC. *APL Mater* **6**, 026104 (2018).
30. Meshkian R., Ingason A. S., Arnalds U. B., Magnus F., Lu J., Rosen J. A magnetic atomic laminate from thin film synthesis: (Mo<sub>0.5</sub>Mn<sub>0.5</sub>)<sub>2</sub>GaC. *APL Mater* **3**, 076102 (2015).
31. Gupta S., Hoffman E. N., Barsoum M. W. Synthesis and oxidation of Ti<sub>2</sub>InC, Zr<sub>2</sub>InC, (Ti<sub>0.5</sub>Zr<sub>0.5</sub>)<sub>2</sub>InC and (Ti<sub>0.5</sub>Hf<sub>0.5</sub>)<sub>2</sub>InC in air. *J Alloys Compd* **426**, 168-175 (2006).
32. Manoun B., Leaffer O. D., Gupta S., Hoffman E. N., Saxena S. K., Spanier J. E., *et al.* On the compression behavior of Ti<sub>2</sub>InC, (Ti<sub>0.5</sub>Zr<sub>0.5</sub>)<sub>2</sub>InC, and M<sub>2</sub>SnC (M = Ti, Nb, Hf) to quasi-hydrostatic pressures up to 50 GPa. *Solid State Commun* **149**, 1978-1983 (2009).
33. Barsoum M. W., Golczewski J., Seifert H. J., Aldinger F. Fabrication and electrical and thermal properties of Ti<sub>2</sub>InC, Hf<sub>2</sub>InC and (Ti,Hf)<sub>2</sub>InC. *J Alloys Compd* **340**, 173-179 (2002).

34. Kerdsonpanya S., Buchholt K., Tengstrand O., Lu J., Jensen J., Hultman L., *et al.* Phase-stabilization and substrate effects on nucleation and growth of  $(\text{Ti,V})_{n+1}\text{GeC}_n$  thin films. *J Appl Phys* **110**, 053516 (2011).
35. Lin S., Huang Y., Zu L., Kan X., Lin J., Song W., *et al.* Alloying effects on structural, magnetic, and electrical/thermal transport properties in MAX-phase  $\text{Cr}_{2-x}\text{M}_x\text{GeC}$  ( $\text{M} = \text{Ti}, \text{V}, \text{Mn}, \text{Fe}, \text{and Mo}$ ). *J Alloys Compd* **680**, 452-461 (2016).
36. Phatak N. A., Saxena S. K., Fei Y., Hu J. Synthesis of a new MAX compound  $(\text{Cr}_{0.5}\text{V}_{0.5})_2\text{GeC}$  and its compressive behavior up to 49 GPa. *J Alloys Compd* **475**, 629-634 (2009).
37. Scabarozzi T. H., Benjamin S., Adamson B., Applegate J., Roche J., Pfeiffer E., *et al.* Combinatorial Investigation of the Stoichiometry, Electronic Transport and Elastic Properties of  $(\text{Cr}_{1-x}\text{V}_x)_2\text{GeC}$  Thin Films. *Scripta Mater* **66**, 85-88 (2011).
38. Ingason A. S., Mockute A., Dahlqvist M., Magnus F., Olafsson S., Arnalds U. B., *et al.* Magnetic self-organized atomic laminate from first principles and thin film synthesis. *Phys Rev Lett* **110**, 195502 (2013).
39. Liu Z., Waki T., Tabata Y., Nakamura H. Mn-doping-induced itinerant-electron ferromagnetism in  $\text{Cr}_2\text{GeC}$ . *Phys Rev B* **89**, 054435 (2014).
40. Rivin O., Caspi E. N., Pesach A., Shaked H., Hoser A., Georgii R., *et al.* Evidence for ferromagnetic ordering in the MAX phase  $(\text{Cr}_{0.96}\text{Mn}_{0.04})_2\text{GeC}$ . *Mater Res Lett* **5**, 465-471 (2017).
41. Tao Q., Dahlqvist M., Lu J., Kota S., Meshkian R., Halim J., *et al.* Two-dimensional  $\text{Mo}_{1.33}\text{C}$  MXene with divacancy ordering prepared from parent 3D laminate with in-plane chemical ordering. *Nat Commun* **8**, 14949 (2017).
42. Dahlqvist M., Lu J., Meshkian R., Tao Q., Hultman L., Rosen J. Prediction and synthesis of a family of atomic laminate phases with Kagomé-like and in-plane chemical ordering. *Sci Adv* **3**, e1700642 (2017).
43. Lu J., Thore A., Meshkian R., Tao Q., Hultman L., Rosen J. Theoretical and experimental exploration of a novel in-plane chemically-ordered  $(\text{Cr}_{2/3}\text{M}_{1/3})_2\text{AlC}$  i-MAX phase with  $\text{M} = \text{Sc}$  and  $\text{Y}$ . *Cryst Growth Des* **17**, 5704-5711 (2017).
44. Meshkian R., Dahlqvist M., Lu J., Wickman B., Halim J., Thörnberg J., *et al.* W-based atomic laminates and their 2D derivative  $\text{W}_{1.33}\text{C}$  MXene with vacancy ordering. *Adv Mater* **30**, 1706409 (2018).
45. Chen L., Dahlqvist M., Lapauw T., Tunca B., Wang F., Lu J., *et al.* Theoretical Prediction and Synthesis of  $(\text{Cr}_{2/3}\text{Zr}_{1/3})_2\text{AlC}$  i-MAX Phase. *Inorg Chem* **57**, 6237-6244 (2018).
46. Thörnberg J., Halim J., Lu J., Meshkian R., Palisaitis J., Hultman L., *et al.* Synthesis of  $(\text{V}_{2/3}\text{Sc}_{1/3})_2\text{AlC}$  i-MAX phase and  $\text{V}_{2-x}\text{C}$  MXene scrolls. *Nanoscale* **11**, 14720-14726 (2019).
47. Tao Q., Lu J., Dahlqvist M., Mockute A., Calder S., Petruhins A., *et al.* Atomically Layered and Ordered Rare-Earth i-MAX Phases: A New Class of Magnetic Quaternary Compounds. *Chem Mater* **31**, 2476-2485 (2019).
48. Dahlqvist M., Petruhins A., Lu J., Hultman L., Rosen J. Origin of Chemically Ordered Atomic Laminates (i-MAX): Expanding the Elemental Space by a Theoretical/Experimental Approach. *ACS Nano* **12**, 7761-7770 (2018).
49. Petruhins A., Dahlqvist M., Lu J., Hultman L., Rosen J. Theoretical prediction and experimental verification of the chemically-ordered atomic-laminate i-MAX phases  $(\text{Cr}_{2/3}\text{Sc}_{1/3})_2\text{GaC}$  and  $(\text{Mn}_{2/3}\text{Sc}_{1/3})_2\text{GaC}$ . *Cryst Growth Des* **20**, 55-61 (2020).

50. Petruhins A., Lu J., Hultman L., Rosen J. Synthesis of atomically layered and chemically ordered rare-earth (RE) *i*-MAX phases;  $(\text{Mo}_{2/3}\text{RE}_{1/3})_2\text{GaC}$  with RE = Gd, Tb, Dy, Ho, Er, Tm, Yb, and Lu. *Mater Res Lett* **7**, 446-452 (2019).
51. Greenwood N. N., Earnshaw A. *Chemistry of the Elements* (Butterworth-Heinemann, 1997).
52. Huheey J. E., Keiter E. A., Keiter R. L. *Inorganic Chemistry : Principles of Structure and Reactivity* (HarperCollins, New York, USA, 1993).
